# Supplementary material for: Influence of ligand substituent conformation on the spin state of an iron(ii)/di(pyrazol-1-yl)pyridine complex
Source: Royal Society of Chemistry journal article supplement (doi:10.1039/d1dt00590a), 2021-01-01
Supplement: d1dt00590a1.pdf [file d1dt00590a1.pdf]

## Influence of Ligand Substituent Conformation on the Spin State of an Iron(II)/Di(pyrazol-1-yl)pyridine Complex

Rafal Kulmaczewski, Mark J. Howard and Malcolm A. Halcrow\*

*School of Chemistry, University of Leeds, Woodhouse Lane, Leeds, UK LS2 9JT.  
E-mail: m.a.halcrow@leeds.ac.uk.*

### Supporting Information

|                                                                                                                                              | Page |
|----------------------------------------------------------------------------------------------------------------------------------------------|------|
| <b>Experimental</b>                                                                                                                          | 2    |
| <b>Scheme S1</b> Parameters discussed in the energy-minimised structures of the compounds.                                                   | 2    |
| <b>Figure S1</b> Energy-minimise d structures of the organic ligands in this work with parallel and perpendicular substituent conformations. | 3    |
| <b>Table S1</b> Energies of the minimised organic ligands with parallel and perpendicular substituent conformations.                         | 3    |
| <b>Figure S2</b> Energy-minimise d structures of the complexes in this work with parallel and perpendicular substituent conformations.       | 4    |
| <b>Table S2</b> Computed metric parameters for the energy-minimise d complexes.                                                              | 6    |
| <b>Figure S3</b> Computed frontier orbital energies for the parallel and perpendicular conformations of low-spin $1^{2+}$ .                  | 8    |
| <b>Figure S4</b> Computed frontier orbital energies for the parallel and perpendicular conformations of low-spin $2^{2+}$ .                  | 9    |
| <b>Figure S5</b> Computed frontier orbital energies for the parallel and perpendicular conformations of low-spin $2^{2+}$ .                  | 10   |
| <b>Figure S6</b> Frontier orbitals of low-spin $3^{2+}$ in the parallel ligand conformation.                                                 | 11   |
| <b>Figure S7</b> Frontier orbitals of low-spin $3^{2+}$ in the perpendicular ligand conformation.                                            | 12   |
| <b>Table S3</b> Computed atomic coordinates for the energy-minimised free ligands.                                                           | 13   |
| <b>Table S4</b> Computed atomic coordinates for the energy-minimised complexes.                                                              | 17   |
| <b>References</b>                                                                                                                            | 31   |

## Experimental

The iron(II) complexes of 4-(methylsulfanyl)-2,6-di(pyrazol-1-yl)pyridine ( $\text{bpp}^{\text{SMc}}$ ),<sup>1</sup> 4-(*iso*-propylsulfanyl)-2,6-di(pyrazol-1-yl)pyridine ( $\text{bpp}^{\text{SiPr}}$ )<sup>2</sup> and 4-(*tert*-butylsulfanyl)-2,6-di(pyrazol-1-yl)pyridine ( $\text{bpp}^{\text{SiBu}}$ )<sup>3</sup> have been reported previously. The same of  $[\text{Fe}(\text{bpp}^{\text{SiBu}})_2][\text{BF}_4]_2$  (**3** $[\text{BF}_4]_2$ ) used for the solution magnetic measurement was prepared by our published procedure.<sup>3</sup>

The magnetic susceptibility measurement of **3** $[\text{BF}_4]_2$  in solution has not been published before, and was obtained by Evans method using a Bruker Avance 500 FT spectrometer operating at 500.1 MHz.<sup>4</sup> Tetramethylsilane was added to all the solutions as an internal standard. A diamagnetic correction for the sample,<sup>5</sup> and a correction for the variation of the density of the solvent with temperature,<sup>6</sup> were applied to these data. Thermodynamic parameters were derived by fitting these data to eq 1 and 2:\*

$$\ln[(1 - n_{\text{HS}}(T))/n_{\text{HS}}(T)] = \Delta H/RT - \Delta S/R \quad (1)$$

$$\Delta S = \Delta H/T_{1/2} \quad (2)$$

DFT calculations were performed using *SPARTAN'18* for Windows,<sup>7</sup> with the B86PW91 functional and def2-SVP basis set. Low-spin systems were treated as spin-restricted, and high-spin systems were treated as spin-unrestricted. The calculations were performed in the gas phase, since a solvent gradient for iron is not implemented in *SPARTAN'18* at the time of writing.

Published atomic coordinates for high-spin and low-spin  $[\text{Fe}(\text{bpp})_2]^{2+}$ , minimised under the same protocol, were used as the starting point for the geometry minimisations,<sup>8</sup> with the appropriate alkylsulfanyl substituents appended for each complex. The resultant minimum structures were then reminimised in the perpendicular alkylsulfanyl substituent conformation (Scheme 2), with the C {pyridyl}–C {pyridyl}–S–C {R} torsions fixed at  $\pm 90^\circ$ . This was necessary to prevent the molecules relaxing back toward their parallel alkylsulfanyl conformations, which are the global minimum structures in this computational protocol.

Starting structures for the metal-free ligands were produced from the minimised complexes, and were minimised freely and with fixed C {pyridyl}–C {pyridyl}–S–C {R} torsions as described above.

\*Equation 1 is a rearrangement of  $\Delta G = -RT \ln K$ , where  $K$  is the ratio of high-spin and low-spin molecules in the sample at temperature  $T$ , and  $\Delta G = \Delta H - T\Delta S$ . Equation 2 reflects that, at  $T_{1/2}$ , the SCO is at equilibrium so that  $\Delta G = 0$  and  $\Delta H = T_{1/2}\Delta S$ .

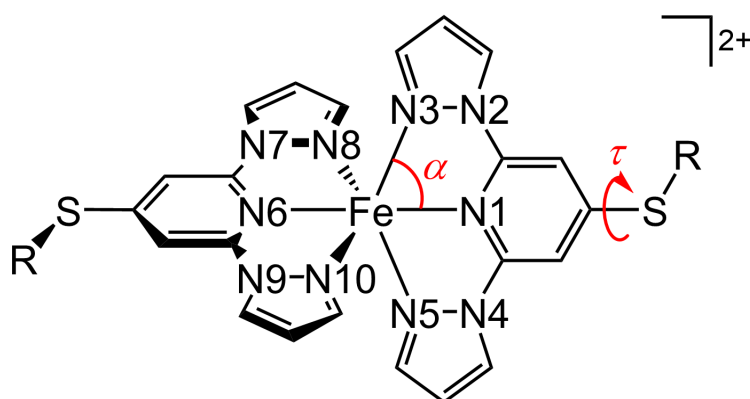

**Scheme S1** Atom numbering scheme and structural parameters discussed in the energy-minimised structures of the compounds (Table S1).

$\alpha$  is the average bite angle of the tridentate ligands, while  $\tau$  is the average of the magnitude of the C {pyridyl}–C {pyridyl}–S–C {R} torsion angles in the molecule.

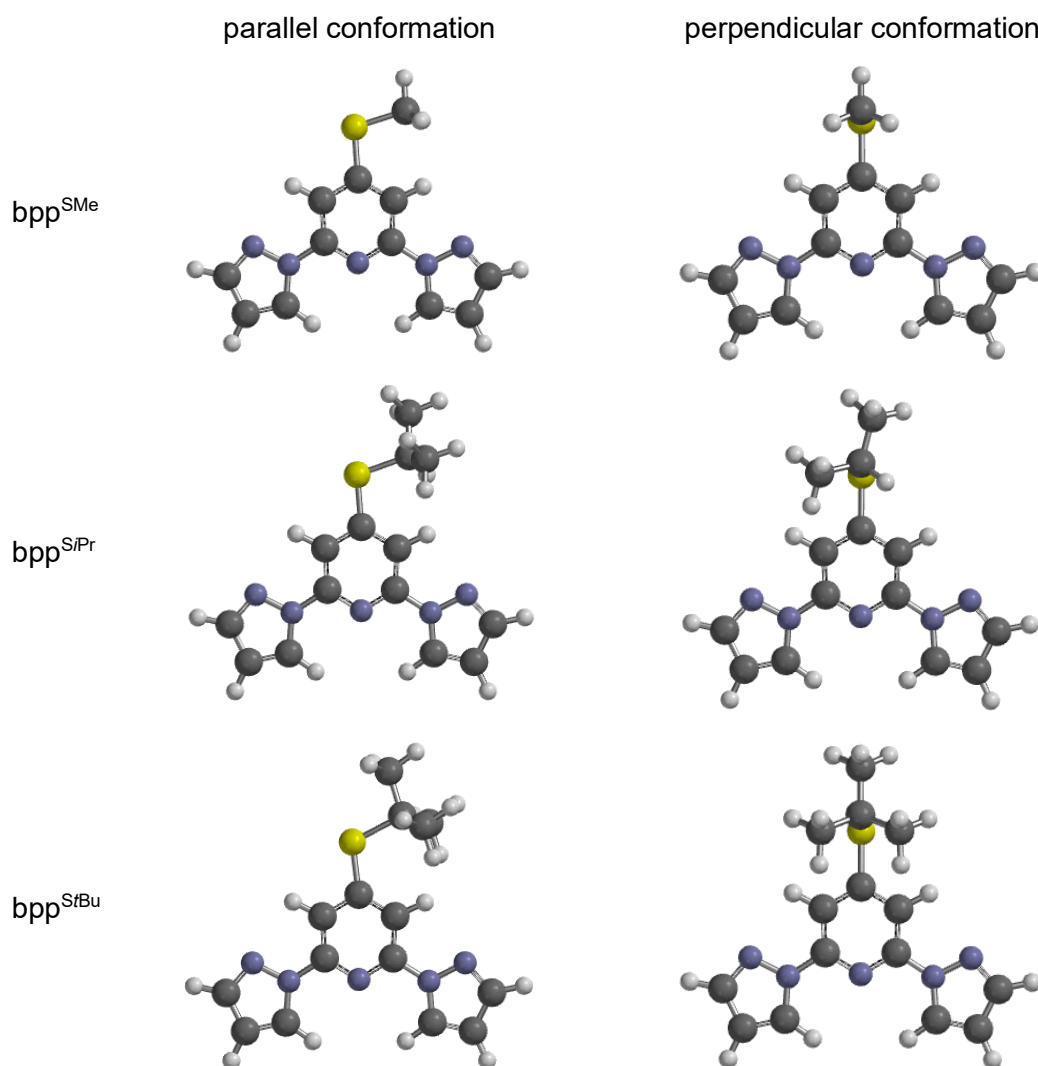

**Figure S1** DFT energy-minimised structures of the organic ligands in this work, with parallel and perpendicular substituent conformations.

Colour code: C, dark grey; H, white; N, blue; S, yellow.

As usual for *tris*-heterocycles of this type, the ligands minimised with a *transoid* disposition of pyridyl and pyrazolyl N donor atoms.<sup>9</sup> The pyrazolyl rings must rotate by *ca* 180° to adopt a *cisoid* conformation suitable for metal binding. This should have a minimal effect on the relative energies of the sulfanyl substituent conformations however, which are the main interest of this calculation.

**Table S1** Energies of the minimised organic ligands (Figure S1).  $\Delta E\{\text{conf}\}$  is the energy difference between the parallel and perpendicular sulfanyl conformations. The average C{pyridyl}–C{pyridyl}–S–C{R} torsion ( $\tau$ , Scheme 1) in the parallel conformations is also given;  $\tau$  was fixed at  $\pm 90^\circ$  in the perpendicular conformations.

|                            | $\tau\{\text{parallel}\} /$<br>deg | $E\{\text{parallel}\} /$<br>Ha | $E\{\text{perpendicular}\} /$<br>Ha | $\Delta E\{\text{conf}\} /$<br>Ha | $\Delta E\{\text{conf}\} /$<br>kcal mol <sup>-1</sup> |
|----------------------------|------------------------------------|--------------------------------|-------------------------------------|-----------------------------------|-------------------------------------------------------|
| $\text{bpp}^{\text{SMe}}$  | 0.10                               | -1135.477292                   | -1135.470042                        | 0.007250                          | 4.5                                                   |
| $\text{bpp}^{\text{SiPr}}$ | 3.20                               | -1214.073111                   | -1214.067814                        | 0.005297                          | 3.3                                                   |
| $\text{bpp}^{\text{SiBu}}$ | 0.05                               | -1253.366196                   | -1253.365016                        | 0.001180                          | 0.7                                                   |

Low-spin

High-spin

$1^{2+}$ , parallel conformation

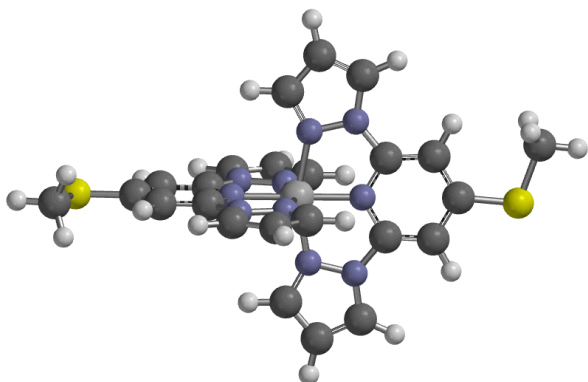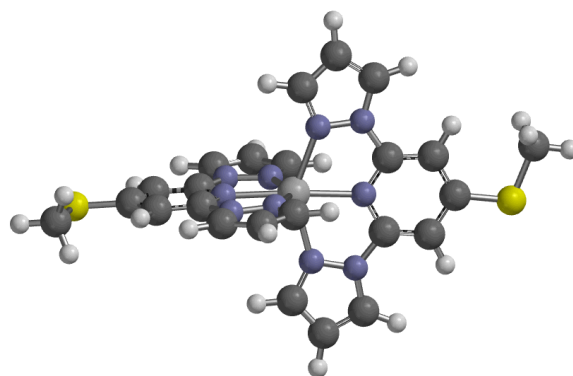

$1^{2+}$ , perpendicular conformation

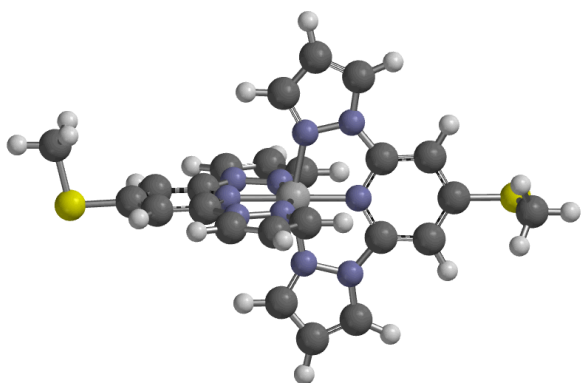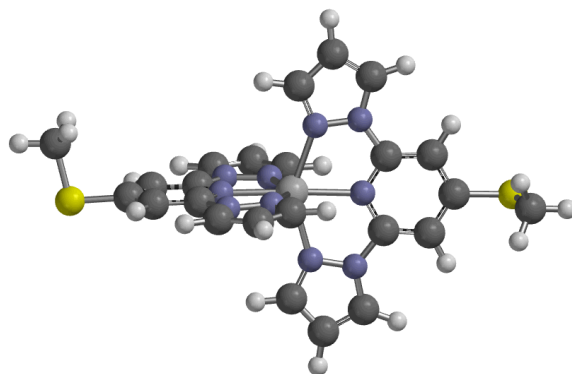

$2^{2+}$ , parallel conformation

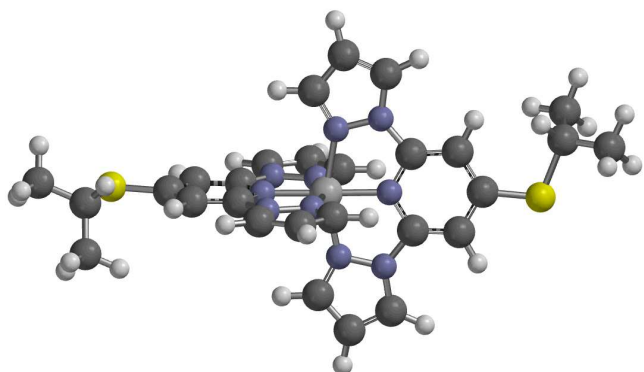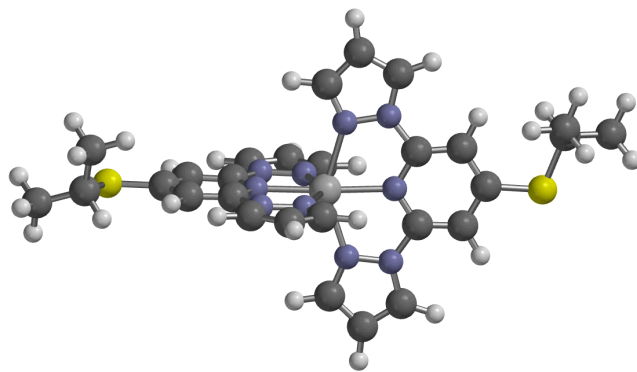

**Figure S2** DFT energy-minimised structures of the compounds in this work, with parallel and perpendicular ligand conformations.

Colour code: C, dark grey; H, white; Fe, pale grey; N, blue; S, yellow.

**Low-spin**

**High-spin**

$2^{2+}$ , perpendicular conformation

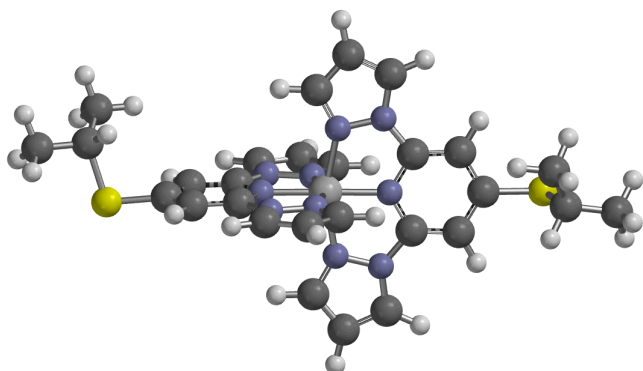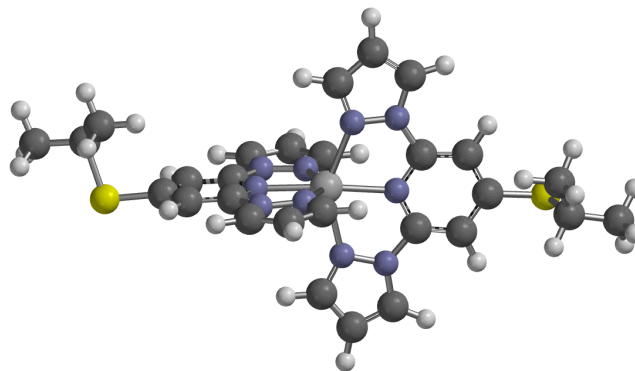

$3^{2+}$ , parallel conformation

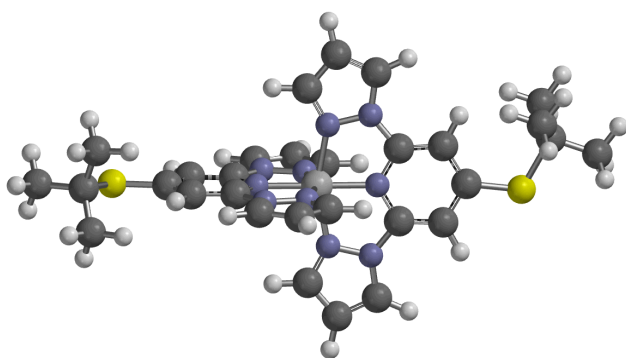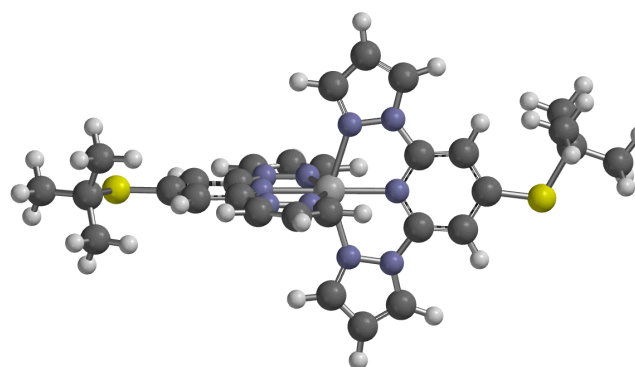

$3^{2+}$ , perpendicular conformation

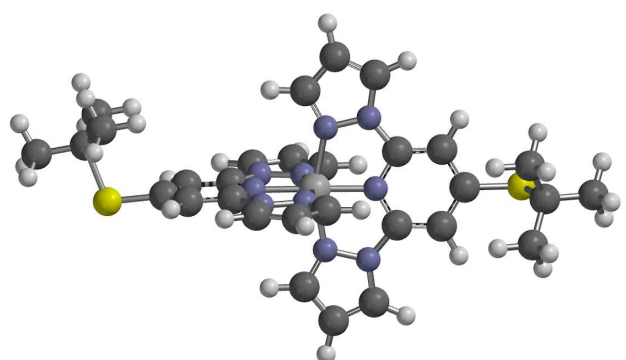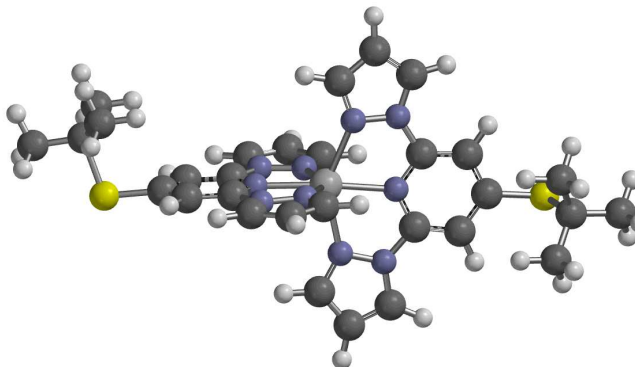

**Figure S2** continued. The low-spin  $3^{2+}$  molecules are the same as in Figure 2 of the main article.

**Table S2** Computed metric parameters for the energy-minimised complexes (Å, °; Figure S42). Experimental crystallographic data are also included in square brackets for comparison, where this is available. The atom numbering in the table is shown in Scheme S1.  $\alpha$  is the average bite angle of the tridentate ligands, while  $\tau$  is the average of the magnitude of the C{pyridyl}–C{pyridyl}–S–C{R} torsion angles in the molecule (Scheme S1).

| Conformation                  | [Fe(bpp) <sub>2</sub> ] <sup>2+</sup> <sup>a</sup> |                    | I <sup>2+</sup> (R = SMe) |                    |                 |                 |
|-------------------------------|----------------------------------------------------|--------------------|---------------------------|--------------------|-----------------|-----------------|
|                               | HS                                                 | LS                 | parallel <sup>b</sup>     |                    | perpendicular   |                 |
|                               | HS                                                 | LS                 | HS                        | LS                 | HS              | LS              |
| Fe–N1                         | 2.155 [2.1390(14)]                                 | 1.906 [1.9049(15)] | 2.141 [2.118(4)]          | 1.904 [1.901(5)]   | 2.153           | 1.903           |
| Fe–N3                         | 2.202 [2.2063(17)]                                 | 1.980 [1.9913(17)] | 2.206 [2.168(5)]          | 1.978 [1.972(5)]   | 2.203           | 1.980           |
| Fe–N5                         | 2.201 [2.1865(19)]                                 | 1.979 [1.9751(17)] | 2.210 [2.160(5)]          | 1.980 [1.965(5)]   | 2.206           | 1.979           |
| Fe–N6                         | 2.157 [2.1402(15)]                                 | 1.904 [1.9097(16)] | 2.147 [2.103(4)]          | 1.906 [1.901(4)]   | 2.153           | 1.903           |
| Fe–N8                         | 2.205 [2.203(2)]                                   | 1.980 [1.9760(18)] | 2.205 [2.161(5)]          | 1.980 [1.975(5)]   | 2.203           | 1.979           |
| Fe–N10                        | 2.200 [2.1964(19)]                                 | 1.979 [1.9912(18)] | 2.210 [2.167(5)]          | 1.981 [1.980(5)]   | 2.206           | 1.980           |
| Fe–N{pyridyl} <sub>av</sub>   | 2.156 [2.140(2)]                                   | 1.905 [1.907(2)]   | 2.144 [2.111(6)]          | 1.905 [1.901(7)]   | 2.153           | 1.903           |
| Fe–N{pyrazolyl} <sub>av</sub> | 2.202 [2.198(4)]                                   | 1.980 [1.983(4)]   | 2.208 [2.128(10)]         | 1.980 [1.973(10)]  | 2.205           | 1.980           |
| N1–Fe–N3                      | 73.3 [73.68(6)]                                    | 80.1 [79.97(7)]    | 73.3 [73.58(18)]          | 80.0 [80.19(19)]   | 73.2            | 80.1            |
| N1–Fe–N5                      | 73.4 [73.23(6)]                                    | 80.2 [80.23(7)]    | 73.3 [73.20(18)]          | 79.9 [79.7(2)]     | 73.2            | 80.1            |
| N1–Fe–N6                      | 179.5 [172.98(7)]                                  | 179.6 [178.15(8)]  | 173.7 [168.3(2)]          | 179.9 [175.2(2)]   | 176.1           | 179.3           |
| N1–Fe–N8                      | 106.5 [100.15(7)]                                  | 100.0 [98.08(7)]   | 111.5 [113.08(19)]        | 100.1 [102.6(2)]   | 104.0           | 100.4           |
| N1–Fe–N10                     | 106.9 [113.16(7)]                                  | 99.7 [101.77(7)]   | 102.4 [100.74(18)]        | 100.2 [98.0(2)]    | 109.6           | 99.3            |
| N3–Fe–N5                      | 146.7 [146.88(7)]                                  | 160.3 [160.19(7)]  | 146.6 [146.57(18)]        | 159.9 [159.88(19)] | 146.4           | 160.2           |
| N3–Fe–N6                      | 107.0 [104.33(6)]                                  | 100.3 [100.80(7)]  | 111.4 [96.42(19)]         | 99.9 [95.64(19)]   | 109.6           | 100.4           |
| N3–Fe–N8                      | 91.8 [93.03(7)]                                    | 91.7 [92.15(7)]    | 91.5 [97.4(2)]            | 91.4 [92.8(2)]     | 97.8            | 91.7            |
| N3–Fe–N10                     | 97.4 [98.35(7)]                                    | 91.6 [93.10(7)]    | 97.3 [93.8(2)]            | 91.8 [92.2(2)]     | 91.4            | 91.7            |
| N5–Fe–N6                      | 106.3 [108.32(6)]                                  | 99.4 [98.99(7)]    | 102.2 [117.01(19)]        | 100.3 [104.5(2)]   | 104.0           | 99.3            |
| N5–Fe–N8                      | 97.7 [91.23(7)]                                    | 91.7 [90.23(7)]    | 97.7 [92.12(19)]          | 91.8 [91.1(2)]     | 92.3            | 91.7            |
| N5–Fe–N10                     | 92.1 [95.93(7)]                                    | 91.7 [91.30(7)]    | 92.9 [95.97(19)]          | 92.1 [91.0(2)]     | 97.8            | 91.7            |
| N6–Fe–N8                      | 73.2 [73.10(7)]                                    | 80.1 [80.22(7)]    | 73.1 [73.53(18)]          | 80.0 [79.8(2)]     | 73.2            | 80.1            |
| N6–Fe–N10                     | 73.4 [73.68(7)]                                    | 80.2 [79.91(7)]    | 73.1 [73.49(18)]          | 79.8 [79.76(19)]   | 73.2            | 80.1            |
| N8–Fe–N10                     | 146.6 [146.60(7)]                                  | 160.3 [160.06(6)]  | 146.0 [146.12(18)]        | 159.7 [159.34(19)] | 146.4           | 160.2           |
| $\alpha$                      | 73.3 [73.42(13)]                                   | 80.2 [80.08(14)]   | 73.2 [73.5(4)]            | 79.9 [79.9(4)]     | 73.2            | 80.1            |
| $\tau$                        | –                                                  | –                  | 0.6                       | 2.3                | 90 <sup>f</sup> | 90 <sup>f</sup> |

<sup>a</sup>Data from ref. 8. <sup>b</sup>Crystallographic data from phase 1 of **1**[BF<sub>4</sub>]<sub>2</sub>, ref. 1. <sup>c</sup>Crystallographic data from **2**[BF<sub>4</sub>]<sub>2</sub>·MeCN, ref. 2. <sup>d</sup>Crystallographic data from **3**[ClO<sub>4</sub>]<sub>2</sub>·MeNO<sub>2</sub>, ref. 3. <sup>e</sup>Low-spin crystallographic data from phase 1 of **3**[BF<sub>4</sub>]<sub>2</sub>·xMeNO<sub>2</sub>, ref. 3. There is no known high-spin salt of **3**<sup>2+</sup> where both ligands are in the perpendicular conformation. <sup>f</sup>Fixed during the calculation.

Table S2 continued.

| Conformation                  | $2^{2+}$ (R = SiPr)   |                   |                 |                 | $3^{2+}$ (R = StBu)   |                    |                            |                    |
|-------------------------------|-----------------------|-------------------|-----------------|-----------------|-----------------------|--------------------|----------------------------|--------------------|
|                               | parallel <sup>c</sup> |                   | perpendicular   |                 | parallel <sup>d</sup> |                    | perpendicular <sup>e</sup> |                    |
|                               | HS                    | LS                | HS              | LS              | HS                    | LS                 | HS                         | LS                 |
| Fe–N1                         | 2.140 [2.128(3)]      | 1.905 [1.900(2)]  | 2.152           | 1.903           | 2.140 [2.102(3)]      | 1.906 [1.899(4)]   | 2.151                      | 1.903 [1.904(4)]   |
| Fe–N3                         | 2.212 [2.208(3)]      | 1.979 [1.972(2)]  | 2.211           | 1.980           | 2.210 [2.180(3)]      | 1.981 [1.967(4)]   | 2.214                      | 1.979 [1.990(4)]   |
| Fe–N5                         | 2.205 [2.174(3)]      | 1.979 [1.986(2)]  | 2.200           | 1.979           | 2.209 [2.171(3)]      | 1.980 [1.986(4)]   | 2.199                      | 1.980 [1.978(4)]   |
| Fe–N6                         | 2.140 [2.120(2)]      | 1.905 [1.901(2)]  | 2.152           | 1.904           | 2.135 [2.116(3)]      | 1.903 [1.900(4)]   | 2.151                      | 1.903 [1.902(4)]   |
| Fe–N8                         | 2.209 [2.171(3)]      | 1.979 [1.967(2)]  | 2.211           | 1.981           | 2.212 [2.165(3)]      | 1.980 [1.977(4)]   | 2.214                      | 1.979 [1.966(4)]   |
| Fe–N10                        | 2.208 [2.173(3)]      | 1.979 [1.971(2)]  | 2.200           | 1.980           | 2.206 [2.169(3)]      | 1.978 [1.980(4)]   | 2.199                      | 1.980 [1.986(4)]   |
| Fe–N{pyridyl} <sub>av</sub>   | 2.140 [2.124(4)]      | 1.905 [1.901(3)]  | 2.152           | 1.904           | 2.138 [2.109(4)]      | 1.905 [1.903(6)]   | 2.151                      | 1.903 [1.903(6)]   |
| Fe–N{pyrazolyl} <sub>av</sub> | 2.209 [2.182(7)]      | 1.979 [1.974(5)]  | 2.206           | 1.980           | 2.209 [2.171(6)]      | 1.980 [1.978(8)]   | 2.207                      | 1.980 [1.980(8)]   |
| N1–Fe–N3                      | 73.2 [72.95(10)]      | 79.9 [79.95(9)]   | 73.1            | 80.1            | 73.2 [73.67(11)]      | 79.8 [79.96(15)]   | 73.1                       | 80.2 [79.92(16)]   |
| N1–Fe–N5                      | 73.3 [73.34(10)]      | 80.0 [79.49(9)]   | 73.3            | 80.2            | 73.2 [73.91(11)]      | 79.9 [79.86(15)]   | 73.3                       | 80.1 [79.90(15)]   |
| N1–Fe–N6                      | 177.3 [167.64(10)]    | 179.2 [174.30(9)] | 172.2           | 178.7           | 179.9 [173.83(11)]    | 179.7 [177.01(19)] | 171.5                      | 178.6 [175.75(15)] |
| N1–Fe–N8                      | 108.5 [98.41(10)]     | 99.6 [96.62(9)]   | 101.3           | 99.0            | 106.8 [100.93(11)]    | 100.4 [98.36(15)]  | 100.8                      | 98.9 [95.74(15)]   |
| N1–Fe–N10                     | 104.5 [115.21(10)]    | 100.6 [103.73(9)] | 112.5           | 100.8           | 106.6 [111.95(11)]    | 99.7 [101.77(15)]  | 113.0                      | 100.9 [104.36(15)] |
| N3–Fe–N5                      | 146.4 [146.24(10)]    | 159.8 [159.43(9)] | 146.2           | 160.2           | 146.6 [147.54(12)]    | 159.7 [159.81(15)] | 146.2                      | 160.2 [159.70(16)] |
| N3–Fe–N6                      | 104.7 [98.11(10)]     | 96.0 [95.53(9)]   | 101.3           | 101.0           | 106.7 [103.36(11)]    | 100.1 [97.47(15)]  | 100.8                      | 98.9 [99.90(16)]   |
| N3–Fe–N8                      | 97.3 [94.99(11)]      | 92.0 [91.94(10)]  | 98.2            | 91.7            | 97.2 [94.07(14)]      | 92.2 [91.06(16)]   | 91.7                       | 91.6 [93.04(16)]   |
| N3–Fe–N10                     | 92.6 [95.41(10)]      | 91.7 [92.44(10)]  | 91.7            | 91.6            | 92.5 [96.45(13)]      | 91.8 [91.91(15)]   | 98.0                       | 91.9 [89.48(15)]   |
| N5–Fe–N6                      | 108.9 [115.47(10)]    | 100.6 [105.03(9)] | 112.5           | 98.8            | 106.6 [109.07(11)]    | 100.2 [102.72(15)] | 113.0                      | 100.9 [100.39(15)] |
| N5–Fe–N8                      | 92.2 [91.53(11)]      | 91.7 [90.87(10)]  | 91.3            | 91.7            | 92.2 [93.52(13)]      | 91.7 [92.76(15)]   | 98.0                       | 91.9 [91.15(16)]   |
| N5–Fe–N10                     | 97.0 [97.25(10)]      | 91.7 [91.97(9)]   | 98.2            | 91.8            | 97.2 [94.10(13)]      | 91.4 [91.29(16)]   | 91.8                       | 91.4 [93.38(15)]   |
| N6–Fe–N8                      | 73.2 [73.47(10)]      | 79.9 [79.99(9)]   | 73.1            | 80.1            | 73.2 [73.69(11)]      | 79.9 [80.09(15)]   | 73.1                       | 80.2 [80.02(15)]   |
| N6–Fe–N10                     | 73.3 [73.45(10)]      | 80.0 [79.80(9)]   | 73.3            | 80.1            | 73.5 [73.55(11)]      | 80.0 [79.79(15)]   | 73.3                       | 80.1 [79.87(15)]   |
| N8–Fe–N10                     | 146.5 [146.38(10)]    | 159.8 [159.64(9)] | 146.2           | 160.2           | 146.7 [147.08(11)]    | 159.8 [159.87(14)] | 146.2                      | 160.2 [159.87(16)] |
| $\alpha$                      | 73.3 [73.3(2)]        | 80.0 [79.8(2)]    | 73.2            | 80.1            | 73.3 [73.7(2)]        | 79.9 [79.9(3)]     | 73.2                       | 80.2 [79.9(3)]     |
| $\tau$                        | 5.2                   | 4.1               | 90 <sup>f</sup> | 90 <sup>f</sup> | 3.2                   | 5.6                | 90 <sup>f</sup>            | 90 <sup>f</sup>    |

<sup>a</sup>Data from ref. 8. <sup>b</sup>Crystallographic data from phase 1 of **1**[BF<sub>4</sub>]<sub>2</sub>, ref. 1. <sup>c</sup>Crystallographic data from **2**[BF<sub>4</sub>]<sub>2</sub>·MeCN, ref. 2. <sup>d</sup>Crystallographic data from **3**[ClO<sub>4</sub>]<sub>2</sub>·MeNO<sub>2</sub>, ref. 3. <sup>e</sup>Low-spin crystallographic data from phase 1 of **3**[BF<sub>4</sub>]<sub>2</sub>·xMeNO<sub>2</sub>, ref. 3. There is no known high-spin salt of **3**<sup>2+</sup> where both ligands are in the perpendicular conformation. <sup>f</sup>Fixed during the calculation.

The agreement between the computed and measured low-spin structures is excellent, but the computed high-spin Fe–N distances are up to 1.8 % longer than the experimental values. That's a typical level of agreement for this level of DFT calculation. The computed high-spin Fe–N{pyridyl} bond lengths are 0.013±0.01 Å longer in the perpendicular ligand conformation than in the parallel form, but unfortunately there are no relevant crystallographic data available for comparison. The minimised coordination geometries of the low-spin complexes in both ligand conformations are identical within experimental error.

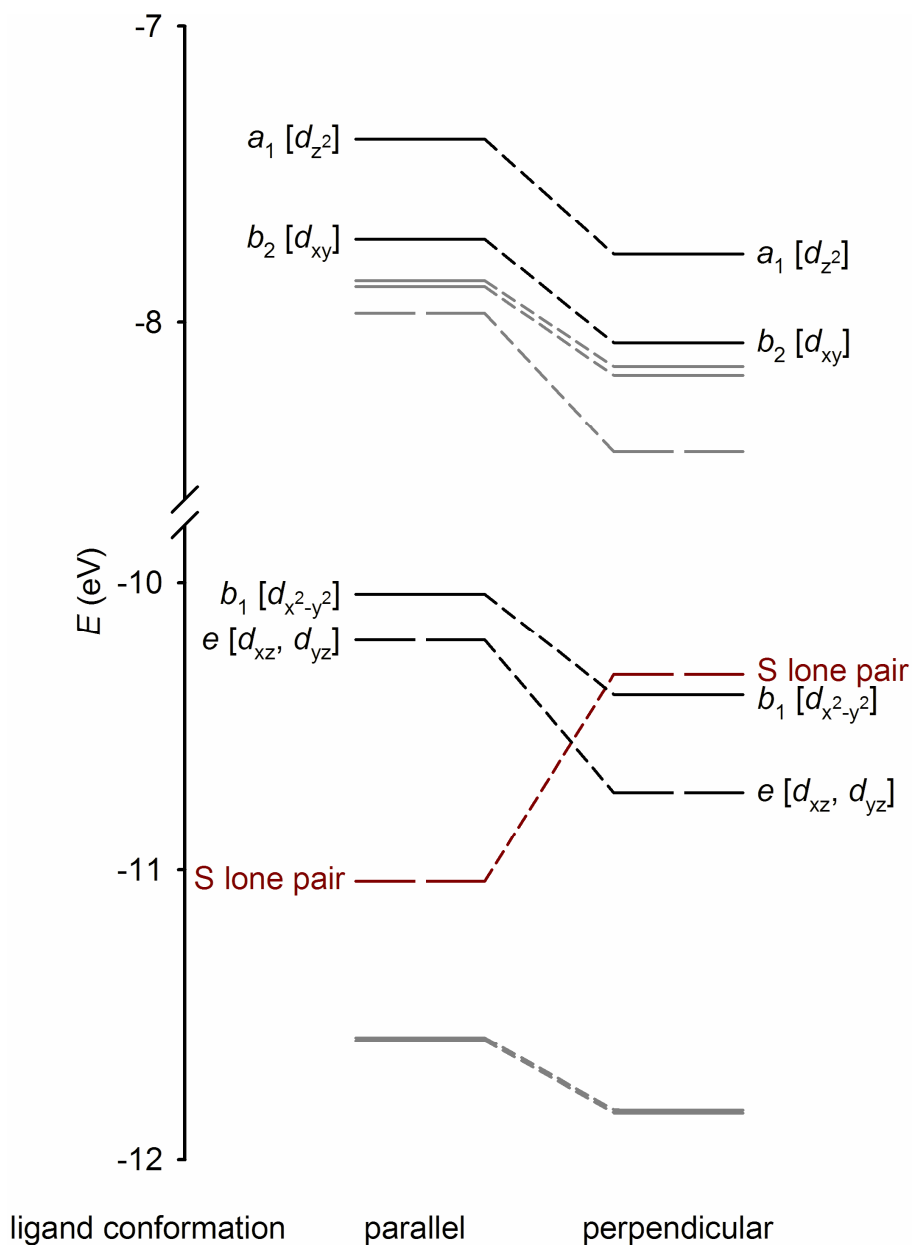

**Figure S3** Computed frontier orbital energies for the parallel and perpendicular conformations of low-spin  $1^{2+}$ .

Energy levels are colour coded as: metal-based  $d$ -orbitals (black); sulfur atom lone pair orbitals (red); and ligand-based  $\pi$  or  $\pi^*$  MOs (grey).



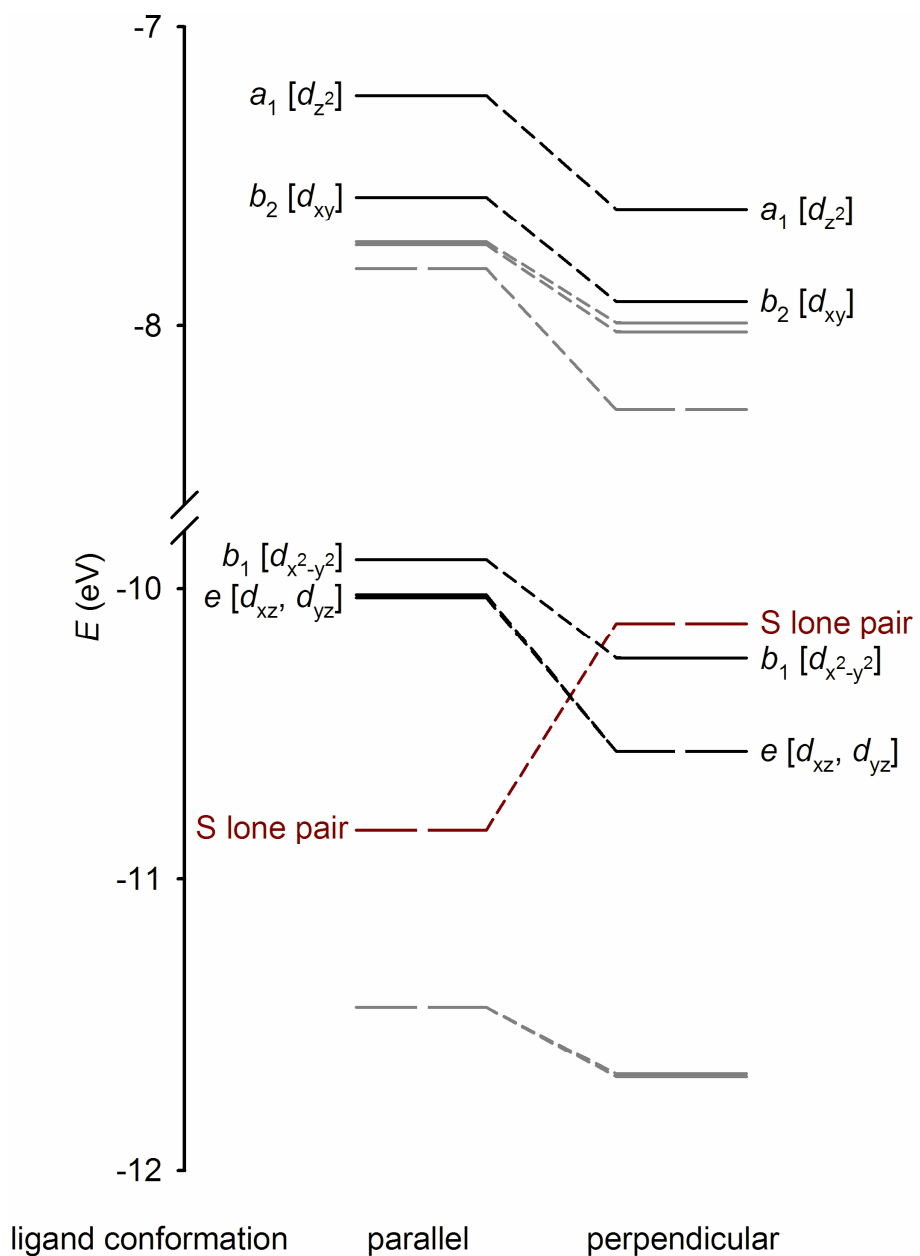

**Figure S4** Computed frontier orbital energies for the parallel and perpendicular conformations of low-spin  $2^{2+}$ .

Energy levels are colour coded as: metal-based  $d$ -orbitals (black); sulfur atom lone pair orbitals (red); and ligand-based  $\pi$  or  $\pi^*$  MOs (grey).

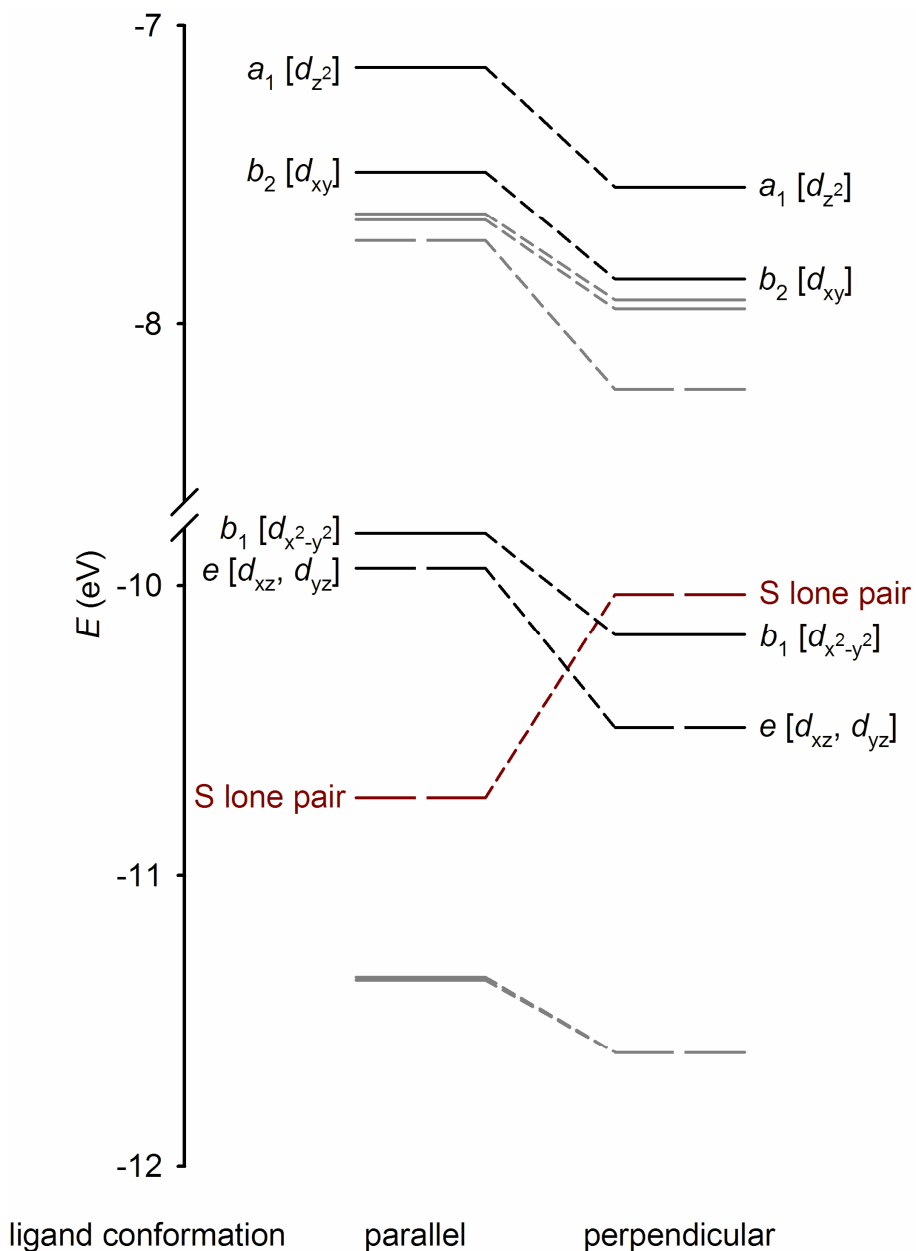

**Figure S5** Computed frontier orbital energies for the parallel and perpendicular conformations of low-spin  $3^{2+}$ .

Energy levels are colour coded as: metal-based  $d$ -orbitals (black); sulfur atom lone pair orbitals (red); and ligand-based  $\pi$  or  $\pi^*$  MOs (grey).

These data are also shown in Figure 4 of the main article. They're replotted here to the same scale as Figures S2 and S3, for ease of comparison.

Plots of the  $d$ -orbital and lone pair MOs for  $3^{2+}$  are shown in Figures S5 and S6.

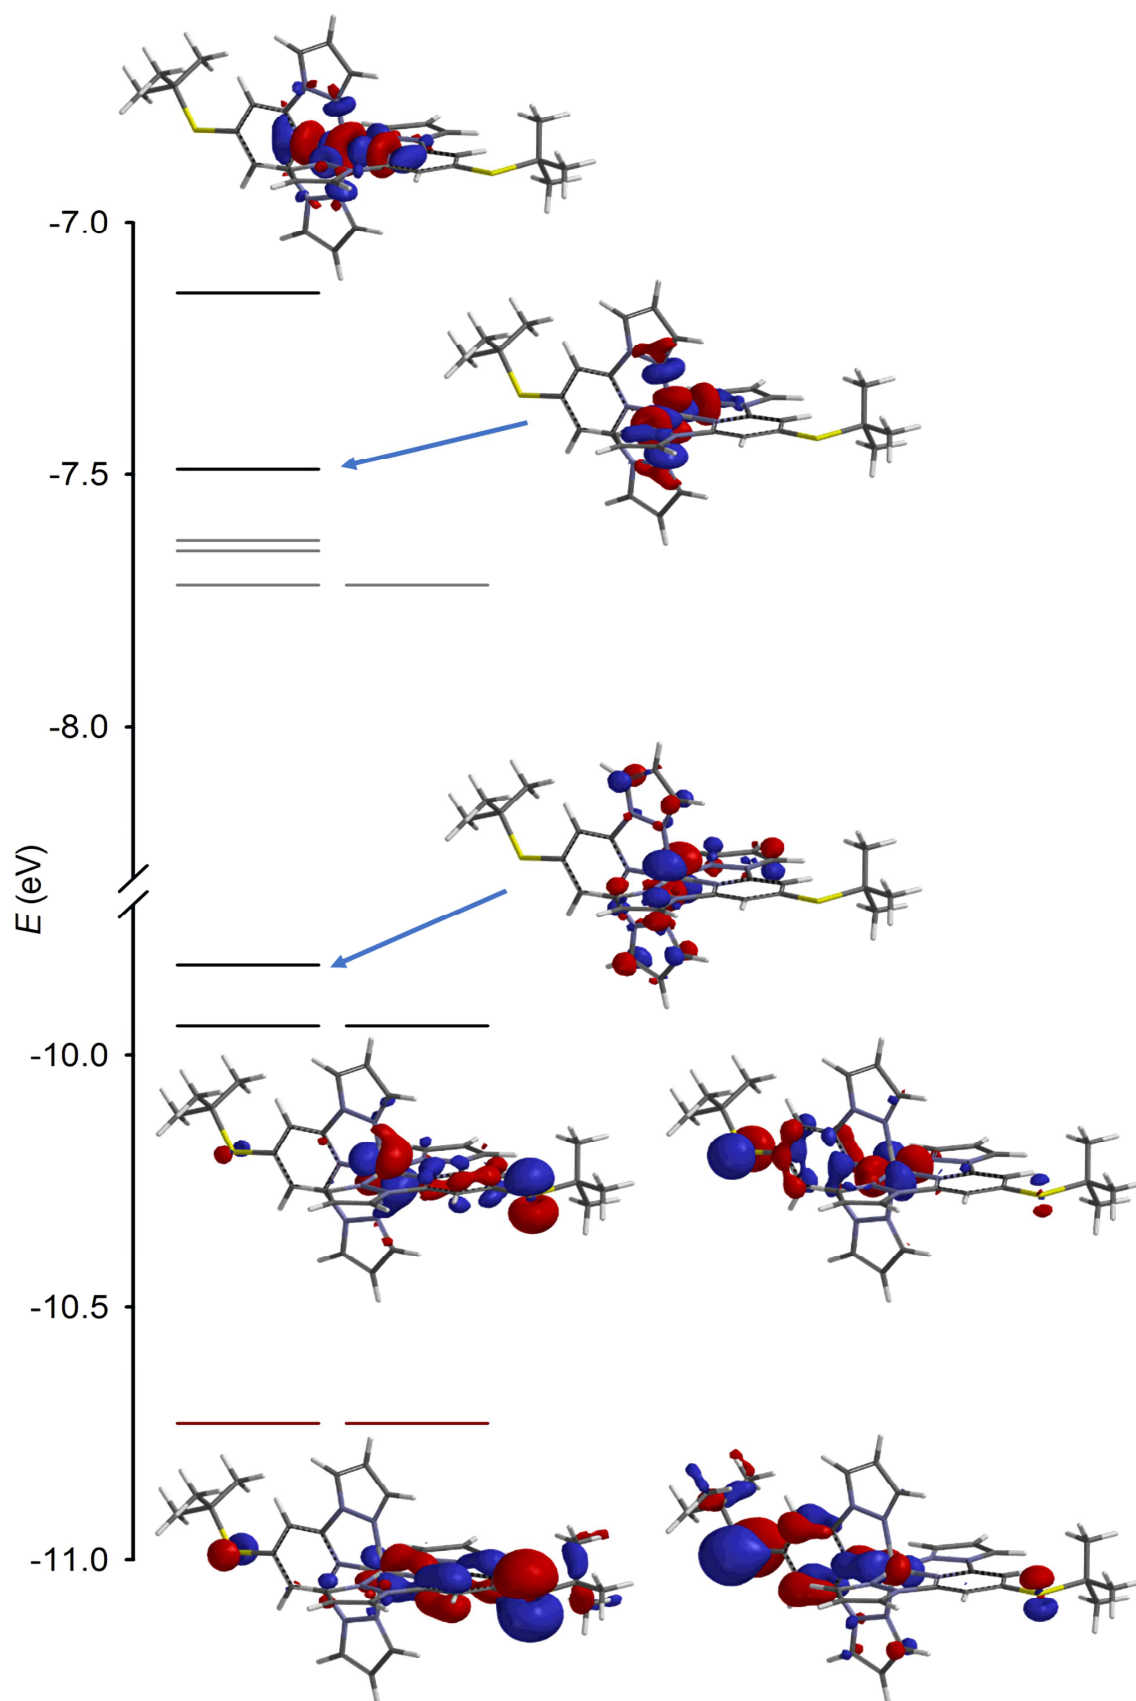

**Figure S6** Frontier molecular orbitals for the parallel conformation of low-spin  $3^{2+}$ . Plots of the metal-centred  $d$ -orbitals (black energy levels) and sulfur lone pair orbitals (red) are shown, but ligand-based  $\pi^*$  MOs (grey) are not included, for clarity.

The corresponding orbitals in the parallel conformation of low-spin  $1^{2+}$  and  $2^{2+}$  are visually indistinguishable from those in the Figure.

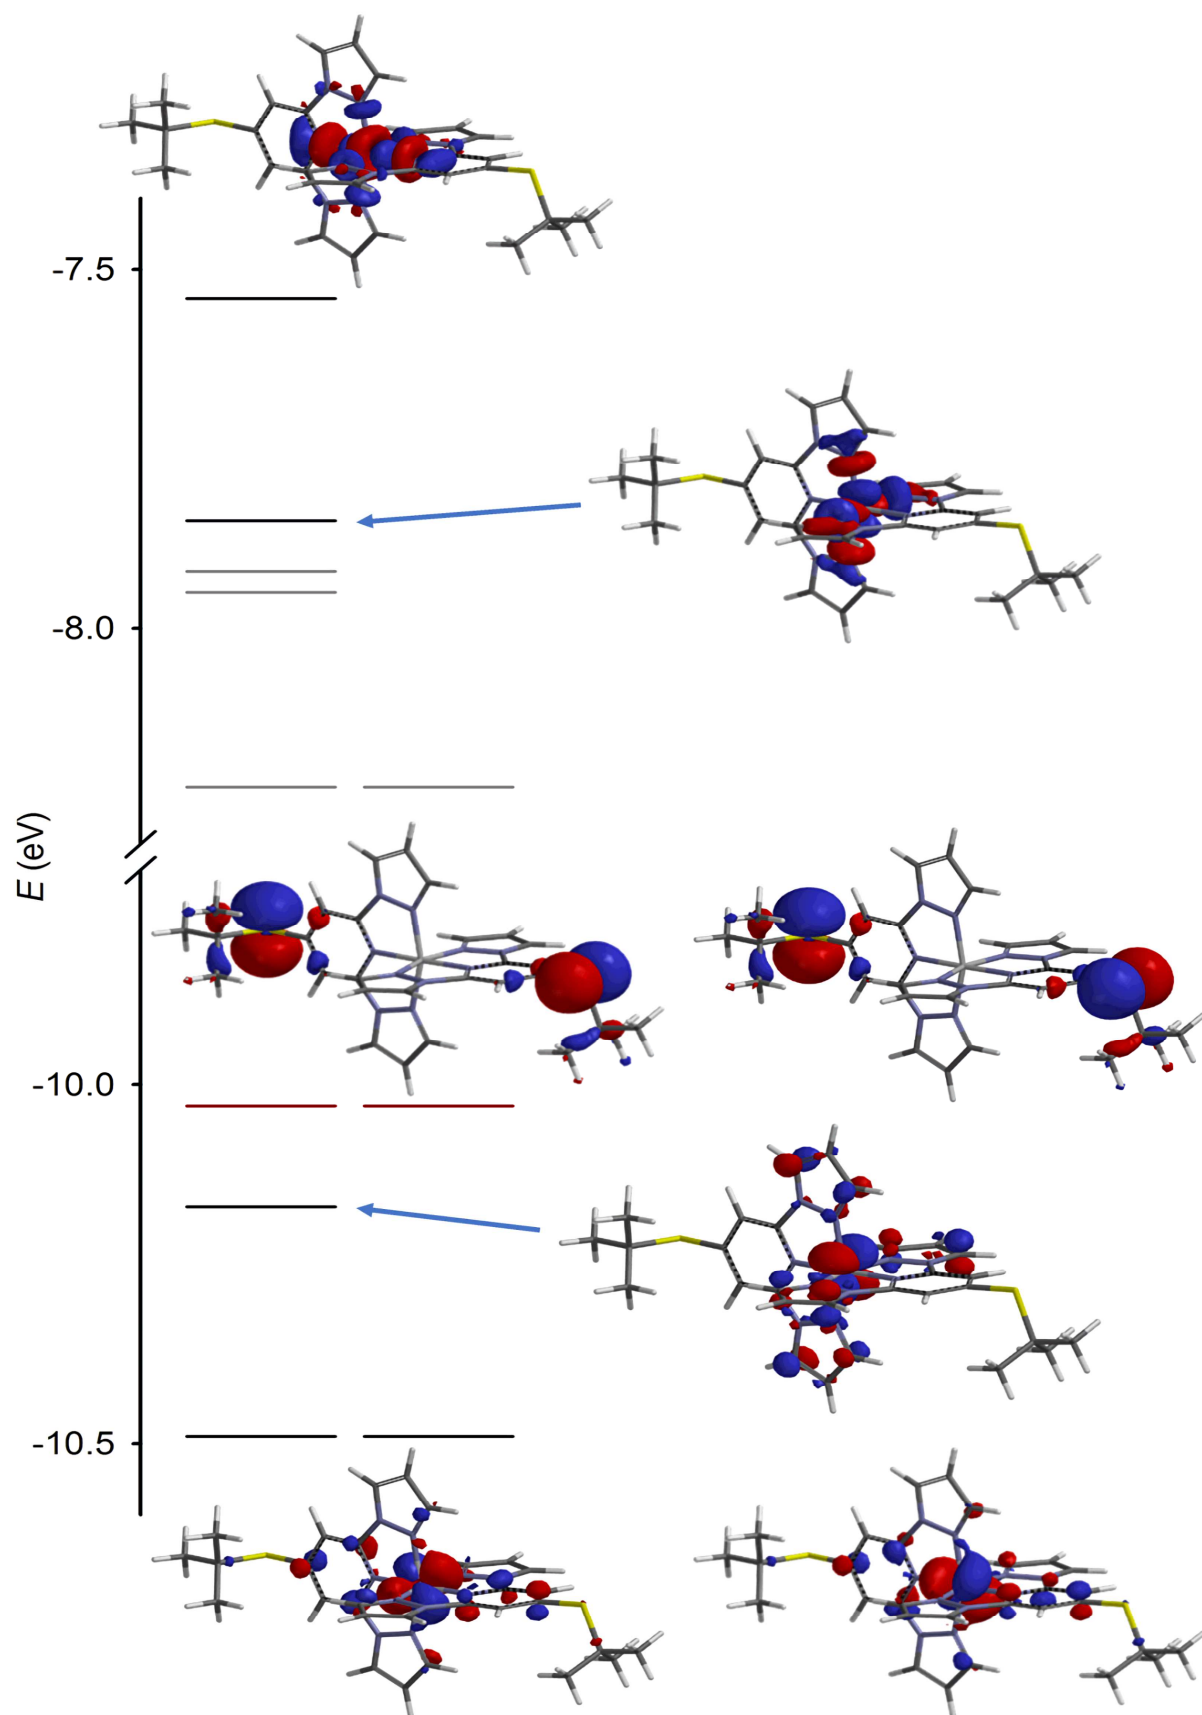

**Figure S7** Frontier molecular orbitals for the perpendicular conformation of low-spin  $3^{2+}$ . Details as for Figure S5. The energy scale of this Figure is expanded compared to Figure S5. The corresponding orbitals in the perpendicular conformation of low-spin  $1^{2+}$  and  $2^{2+}$  are visually indistinguishable from those in the Figure.

**Table S3** Computed atomic coordinates for the energy-minimised organic ligands.

bpp<sup>SMc</sup>, parallel conformation.

|   |            |            |            |
|---|------------|------------|------------|
| N | 0.0990177  | 0.8203364  | 0.0554011  |
| C | -0.5190117 | -0.0796722 | -0.7187504 |
| C | -0.4712988 | -1.4735233 | -0.5257970 |
| H | -1.0159844 | -2.1174014 | -1.2225604 |
| C | 0.2811064  | -1.9507907 | 0.5679664  |
| C | 0.9436217  | -1.0190601 | 1.4015003  |
| C | 0.8114150  | 0.3424845  | 1.0883530  |
| N | -1.2697099 | 0.4522252  | -1.8051627 |
| N | -1.9621162 | -0.3717958 | -2.6360308 |
| C | -2.5423564 | 0.4464645  | -3.5189180 |
| H | -3.1711093 | 0.0259822  | -4.3137223 |
| C | -2.2286692 | 1.8144832  | -3.2645094 |
| H | -2.5574474 | 2.6997391  | -3.8174592 |
| C | -1.4038436 | 1.7807737  | -2.1486602 |
| H | -0.9030225 | 2.5600762  | -1.5699757 |
| N | 1.4589643  | 1.3201733  | 1.8941333  |
| N | 2.2218872  | 0.9453511  | 2.9552402  |
| C | 2.6700644  | 2.0928829  | 3.4724753  |
| H | 3.3217820  | 2.0693197  | 4.3548320  |
| C | 2.1971805  | 3.2263052  | 2.7464976  |
| H | 2.3975913  | 4.2852312  | 2.9364549  |
| C | 1.4166821  | 2.6890103  | 1.7323089  |
| H | 0.8411583  | 3.1375004  | 0.9195706  |
| H | 1.5449248  | -1.3175480 | 2.2680963  |
| S | 0.4618227  | -3.6575216 | 0.9923068  |
| C | -0.5129280 | -4.5263147 | -0.2790554 |
| H | -1.5768372 | -4.2230217 | -0.2550066 |
| H | -0.4385094 | -5.5982704 | -0.0173831 |
| H | -0.0943744 | -4.3734191 | -1.2921455 |

bpp<sup>SiPr</sup>, parallel conformation.

|   |            |            |            |
|---|------------|------------|------------|
| N | 0.5796491  | 1.6760207  | -0.3306937 |
| C | -0.4633472 | 0.8871542  | -0.6147479 |
| C | -0.5666174 | -0.4698084 | -0.2564951 |
| H | -1.4672992 | -1.0153120 | -0.5528213 |
| C | 0.5078107  | -1.0387439 | 0.4613825  |
| C | 1.6194009  | -0.2215497 | 0.7785199  |
| C | 1.5924357  | 1.1145725  | 0.3491965  |
| N | -1.5256950 | 1.5032328  | -1.3357143 |
| N | -2.6459123 | 0.8004473  | -1.6518981 |
| C | -3.4156993 | 1.6694415  | -2.3138800 |
| H | -4.3956161 | 1.3476778  | -2.6881541 |
| C | -2.7973552 | 2.9495944  | -2.4293369 |
| H | -3.1874702 | 3.8497719  | -2.9141502 |
| C | -1.5754631 | 2.8050478  | -1.7865806 |
| H | -0.7434821 | 3.4891466  | -1.6052827 |
| N | 2.6925158  | 1.9722739  | 0.6305788  |
| N | 3.7734587  | 1.5099388  | 1.3135167  |
| C | 4.5999645  | 2.5570433  | 1.3884037  |
| H | 5.5637320  | 2.4487347  | 1.9014836  |
| C | 4.0586806  | 3.7115735  | 0.7487419  |
| H | 4.5061919  | 4.7053297  | 0.6502379  |
| C | 2.8233972  | 3.2972726  | 0.2705627  |
| H | 2.0317094  | 3.8056126  | -0.2842636 |
| H | 2.4890107  | -0.5929830 | 1.3329507  |
| S | 0.6063145  | -2.7260074 | 0.9858238  |
| C | -1.0104856 | -3.4914564 | 0.4792279  |

|   |            |            |            |
|---|------------|------------|------------|
| C | -0.7717804 | -5.0069515 | 0.3929973  |
| H | -0.4779863 | -5.4277301 | 1.3762311  |
| H | 0.0195093  | -5.2557291 | -0.3397844 |
| H | -1.7074036 | -5.5124113 | 0.0799711  |
| C | -2.1480070 | -3.1242482 | 1.4407408  |
| H | -1.9395881 | -3.5023119 | 2.4612892  |
| H | -3.0999173 | -3.5772152 | 1.0927485  |
| H | -2.2987315 | -2.0302550 | 1.5073841  |
| H | -1.2259240 | -3.1071735 | -0.5381864 |

$\text{bpp}^{\text{SiBu}}$ , parallel conformation.

|   |            |            |            |
|---|------------|------------|------------|
| N | 0.2921652  | 2.1078049  | 0.2046889  |
| C | -0.3436654 | 1.2446887  | -0.5956636 |
| C | -0.3336617 | -0.1547878 | -0.4443652 |
| H | -0.8950016 | -0.7521017 | -1.1659839 |
| C | 0.3999998  | -0.6926698 | 0.6353574  |
| C | 1.0787187  | 0.2054034  | 1.4969649  |
| C | 0.9852445  | 1.5784106  | 1.2258811  |
| N | -1.0739005 | 1.8238752  | -1.6731496 |
| N | -1.7790702 | 1.0394042  | -2.5308067 |
| C | -2.3308908 | 1.8944761  | -3.3973592 |
| H | -2.9629709 | 1.5103614  | -4.2077570 |
| C | -1.9853905 | 3.2468833  | -3.1050606 |
| H | -2.2872273 | 4.1542092  | -3.6371931 |
| C | -1.1709351 | 3.1633256  | -1.9839155 |
| H | -0.6554569 | 3.9148906  | -1.3818577 |
| N | 1.6560276  | 2.5130186  | 2.0639572  |
| N | 2.4077574  | 2.0859007  | 3.1128145  |
| C | 2.8870584  | 3.2048269  | 3.6641912  |
| H | 3.5371312  | 3.1367995  | 4.5454422  |
| C | 2.4460386  | 4.3720010  | 2.9724172  |
| H | 2.6752623  | 5.4189222  | 3.1937446  |
| C | 1.6526431  | 3.8864408  | 1.9420831  |
| H | 1.0908942  | 4.3738774  | 1.1422136  |
| H | 1.6685454  | -0.1333873 | 2.3566816  |
| S | 0.5917027  | -2.3986229 | 1.0690092  |
| C | -0.3437463 | -3.5156834 | -0.1300293 |
| C | -0.0314485 | -4.9124346 | 0.4562459  |
| H | 1.0566288  | -5.1209719 | 0.4603326  |
| H | -0.5256721 | -5.6857021 | -0.1661056 |
| H | -0.4107418 | -5.0132938 | 1.4922200  |
| C | -1.8606575 | -3.2574547 | -0.0741212 |
| H | -2.1384463 | -2.2593878 | -0.4582900 |
| H | -2.2391119 | -3.3465145 | 0.9621394  |
| H | -2.3842108 | -4.0113889 | -0.6989704 |
| C | 0.2254050  | -3.4137859 | -1.5575323 |
| H | 1.3150721  | -3.6081877 | -1.5656358 |
| H | 0.0504922  | -2.4257663 | -2.0202080 |
| H | -0.2645811 | -4.1733791 | -2.2023801 |

$\text{bpp}^{\text{SMe}}$ , perpendicular conformation.

|   |            |            |            |
|---|------------|------------|------------|
| N | -0.0924459 | -0.0017716 | -0.7927467 |
| C | -0.2782069 | -1.1439304 | -0.1180897 |
| C | -0.6430850 | -1.2053685 | 1.2428724  |
| H | -0.7826868 | -2.1743720 | 1.7341402  |
| C | -0.8175421 | 0.0161562  | 1.9186943  |
| C | -0.6245276 | 1.2289782  | 1.2322681  |
| C | -0.2623427 | 1.1496468  | -0.1287091 |
| N | -0.0825723 | -2.3405272 | -0.8583596 |
| N | -0.2334563 | -3.5527515 | -0.2598555 |
| C | 0.0302743  | -4.4399808 | -1.2226721 |

|   |            |            |            |
|---|------------|------------|------------|
| H | -0.0194323 | -5.5125297 | -0.9969558 |
| C | 0.3507914  | -3.8063339 | -2.4607554 |
| H | 0.6062389  | -4.2751298 | -3.4160121 |
| C | 0.2670260  | -2.4483189 | -2.1888308 |
| H | 0.4198246  | -1.5565349 | -2.8006756 |
| N | -0.0495897 | 2.3354106  | -0.8816452 |
| N | -0.1826793 | 3.5565073  | -0.2970756 |
| C | 0.0842114  | 4.4287767  | -1.2728072 |
| H | 0.0433006  | 5.5046102  | -1.0614247 |
| C | 0.3986476  | 3.7761711  | -2.5026183 |
| H | 0.6574012  | 4.2300588  | -3.4641820 |
| C | 0.3037222  | 2.4227042  | -2.2126775 |
| H | 0.4482155  | 1.5213192  | -2.8123604 |
| H | -0.7499246 | 2.2039000  | 1.7154200  |
| S | -1.2873666 | 0.0249798  | 3.6603175  |
| C | 0.3827260  | 0.0151935  | 4.4276834  |
| H | 0.9595013  | 0.9146664  | 4.1377753  |
| H | 0.2133106  | 0.0297510  | 5.5213347  |
| H | 0.9406666  | -0.9012809 | 4.1579472  |

bpp<sup>SiPr</sup>, perpendicular conformation.

|   |            |            |            |
|---|------------|------------|------------|
| N | -0.1667382 | 0.0342871  | -1.7339553 |
| C | -0.3978297 | -1.0745328 | -1.0193553 |
| C | -0.7896437 | -1.0734821 | 0.3365737  |
| H | -0.9700562 | -2.0184725 | 0.8595839  |
| C | -0.9512230 | 0.1774402  | 0.9619373  |
| C | -0.7073364 | 1.3557641  | 0.2306584  |
| C | -0.3178320 | 1.2141788  | -1.1172807 |
| N | -0.2282227 | -2.3044830 | -1.7105574 |
| N | -0.4268791 | -3.4871199 | -1.0685281 |
| C | -0.1859159 | -4.4189816 | -1.9944630 |
| H | -0.2778277 | -5.4797460 | -1.7297781 |
| C | 0.1719459  | -3.8445559 | -3.2509031 |
| H | 0.4216434  | -4.3579495 | -4.1845316 |
| C | 0.1329030  | -2.4750197 | -3.0313553 |
| H | 0.3238027  | -1.6135929 | -3.6753334 |
| N | -0.0554757 | 2.3644975  | -1.9093536 |
| N | -0.1861914 | 3.6108190  | -1.3801191 |
| C | 0.1344096  | 4.4373677  | -2.3792672 |
| H | 0.1081221  | 5.5215145  | -2.2127646 |
| C | 0.4786069  | 3.7291165  | -3.5695970 |
| H | 0.7822218  | 4.1378910  | -4.5382394 |
| C | 0.3452643  | 2.3906774  | -3.2292399 |
| H | 0.4922576  | 1.4626155  | -3.7859823 |
| H | -0.8188367 | 2.3526674  | 0.6708747  |
| S | -1.4651758 | 0.2824555  | 2.6824640  |
| C | 0.1873283  | 0.2676626  | 3.5674134  |
| C | 0.8941355  | -1.0894569 | 3.5038717  |
| H | 1.1021081  | -1.4074979 | 2.4643173  |
| H | 0.2856884  | -1.8776849 | 3.9910930  |
| H | 1.8684259  | -1.0291213 | 4.0337573  |
| C | -0.0982515 | 0.7127190  | 5.0093820  |
| H | 0.8481123  | 0.7380668  | 5.5864900  |
| H | -0.7823268 | 0.0027702  | 5.5176787  |
| H | -0.5555819 | 1.7200781  | 5.0428641  |
| H | 0.8043688  | 1.0391082  | 3.0616450  |

bpp<sup>SiBu</sup>, perpendicular conformation.

|   |            |            |            |
|---|------------|------------|------------|
| N | -0.3006814 | 0.0000001  | -1.9889441 |
| C | -0.4723794 | -1.1457420 | -1.3168354 |

|   |            |            |            |
|---|------------|------------|------------|
| C | -0.8237304 | -1.2153967 | 0.0477475  |
| H | -0.9554958 | -2.1883582 | 0.5327281  |
| C | -1.0111646 | 0.0000002  | 0.7340942  |
| C | -0.8237302 | 1.2153969  | 0.0477475  |
| C | -0.4723792 | 1.1457421  | -1.3168354 |
| N | -0.2761638 | -2.3380898 | -2.0654078 |
| N | -0.4104655 | -3.5546892 | -1.4714095 |
| C | -0.1685295 | -4.4350792 | -2.4463955 |
| H | -0.2178738 | -5.5090898 | -2.2283795 |
| C | 0.1334430  | -3.7922595 | -3.6841869 |
| H | 0.3718490  | -4.2537828 | -4.6472125 |
| C | 0.0579628  | -2.4362248 | -3.4003661 |
| H | 0.2026142  | -1.5398430 | -4.0072260 |
| N | -0.2761637 | 2.3380899  | -2.0654080 |
| N | -0.4104648 | 3.5546894  | -1.4714096 |
| C | -0.1685291 | 4.4350793  | -2.4463958 |
| H | -0.2178730 | 5.5090898  | -2.2283799 |
| C | 0.1334427  | 3.7922594  | -3.6841874 |
| H | 0.3718482  | 4.2537826  | -4.6472132 |
| C | 0.0579624  | 2.4362247  | -3.4003664 |
| H | 0.2026134  | 1.5398429  | -4.0072264 |
| H | -0.9554956 | 2.1883584  | 0.5327280  |
| S | -1.4848779 | 0.0000001  | 2.4687366  |
| C | 0.1728493  | -0.0000001 | 3.3975820  |
| C | -0.2677384 | -0.0000005 | 4.8755179  |
| H | -0.8661851 | -0.8989598 | 5.1218624  |
| H | -0.8661845 | 0.8989590  | 5.1218630  |
| H | 0.6318048  | -0.0000010 | 5.5245586  |
| C | 0.9767019  | -1.2686725 | 3.0719780  |
| H | 0.4044423  | -2.1825057 | 3.3214562  |
| H | 1.9163800  | -1.2749847 | 3.6636616  |
| H | 1.2573342  | -1.3142264 | 2.0022129  |
| C | 0.9767017  | 1.2686727  | 3.0719785  |
| H | 1.9163794  | 1.2749852  | 3.6636624  |
| H | 0.4044417  | 2.1825058  | 3.3214566  |
| H | 1.2573344  | 1.3142268  | 2.0022135  |

---



**Table S4** Computed atomic coordinates for the energy-minimised complexes.

| $\text{I}^{2+}$ , parallel conformation, low-spin |            |            |            |
|---------------------------------------------------|------------|------------|------------|
| Fe                                                | 0.0000474  | -0.0451354 | 0.1551196  |
| N                                                 | -0.0424290 | -1.8762026 | -0.3638387 |
| C                                                 | -0.9506803 | -2.3087827 | -1.2697332 |
| C                                                 | -1.0196073 | -3.6389410 | -1.6944356 |
| C                                                 | -0.0916824 | -4.5652453 | -1.1390625 |
| C                                                 | 0.8635184  | -4.1017610 | -0.1825233 |
| H                                                 | 1.5883649  | -4.7971767 | 0.2598098  |
| C                                                 | 0.8466750  | -2.7549176 | 0.1669898  |
| N                                                 | -1.7747191 | -1.2451407 | -1.6865977 |
| N                                                 | -1.5146971 | -0.0104352 | -1.1202915 |
| C                                                 | -2.4177719 | 0.8300575  | -1.6483332 |
| H                                                 | -2.4233143 | 1.8864001  | -1.3584998 |
| C                                                 | -3.2685752 | 0.1492703  | -2.5595900 |
| H                                                 | -4.0937812 | 0.5706206  | -3.1415130 |
| C                                                 | -2.8341718 | -1.1691095 | -2.5613251 |
| H                                                 | -3.1937691 | -2.0454577 | -3.1088609 |
| N                                                 | 1.6972826  | -2.1022755 | 1.0805772  |
| N                                                 | 1.4897324  | -0.7463784 | 1.2502301  |
| C                                                 | 2.3977389  | -0.3493741 | 2.1557552  |
| H                                                 | 2.4435708  | 0.6993935  | 2.4685317  |
| C                                                 | 3.1981321  | -1.4430074 | 2.5796760  |
| H                                                 | 4.0147290  | -1.4274657 | 3.3076847  |
| C                                                 | 2.7271111  | -2.5445142 | 1.8781559  |
| H                                                 | 3.0403967  | -3.5930367 | 1.8862107  |
| N                                                 | 0.0469992  | 1.7877625  | 0.6761695  |
| C                                                 | 0.8155546  | 2.6715883  | -0.0023782 |
| C                                                 | 0.8997951  | 4.0228852  | 0.3457613  |
| H                                                 | 1.5324369  | 4.7072967  | -0.2292904 |
| C                                                 | 0.1413631  | 4.4725463  | 1.4640692  |
| C                                                 | -0.6646966 | 3.5330635  | 2.1782282  |
| C                                                 | -0.6751834 | 2.2103211  | 1.7457139  |
| N                                                 | 1.4839778  | 2.0293019  | -1.0625402 |
| N                                                 | 1.2518197  | 0.6737913  | -1.2015456 |
| C                                                 | 1.9930459  | 0.2827185  | -2.2501870 |
| H                                                 | 1.9876075  | -0.7648100 | -2.5706052 |
| C                                                 | 2.7101352  | 1.3795392  | -2.7978348 |
| H                                                 | 3.3930631  | 1.3675135  | -3.6525698 |
| C                                                 | 2.3655757  | 2.4761130  | -2.0195176 |
| H                                                 | 2.6757726  | 3.5239331  | -2.0738533 |
| N                                                 | -1.3952755 | 1.1385328  | 2.3082758  |
| N                                                 | -1.2280042 | -0.0956622 | 1.7074756  |
| C                                                 | -1.9955623 | -0.9468169 | 2.4061066  |
| H                                                 | -2.0388926 | -2.0056219 | 2.1288647  |
| C                                                 | -2.6648782 | -0.2729921 | 3.4616831  |
| H                                                 | -3.3554942 | -0.7025337 | 4.1935695  |
| C                                                 | -2.2620051 | 1.0525069  | 3.3729322  |
| H                                                 | -2.5217284 | 1.9270596  | 3.9774791  |
| H                                                 | -1.7700397 | -3.9508227 | -2.4288753 |
| H                                                 | -1.2569440 | 3.8551071  | 3.0443897  |
| S                                                 | -0.0210131 | -6.2722312 | -1.5180849 |
| S                                                 | 0.0972763  | 6.1192612  | 2.0543809  |
| C                                                 | -1.2925786 | -6.5230879 | -2.7966701 |
| C                                                 | 1.2505615  | 7.0317851  | 0.9805848  |
| H                                                 | 1.2407818  | 8.0631241  | 1.3802874  |
| H                                                 | 0.8987429  | 7.0532250  | -0.0682859 |
| H                                                 | 2.2801623  | 6.6333441  | 1.0567064  |
| H                                                 | -1.2112757 | -7.5954050 | -3.0562533 |
| H                                                 | -1.0834343 | -5.9233033 | -3.7028186 |
| H                                                 | -2.3097660 | -6.3304176 | -2.4055038 |

**1<sup>2+</sup>**, parallel conformation, high-spin

---

|    |            |            |            |
|----|------------|------------|------------|
| Fe | 0.0001916  | 0.0030391  | -0.0044885 |
| N  | -0.0071318 | -2.1206646 | -0.3165015 |
| C  | -1.0679182 | -2.7303052 | -0.8828257 |
| C  | -1.1216058 | -4.1043924 | -1.1431074 |
| C  | 0.0080643  | -4.8929410 | -0.7938541 |
| C  | 1.1297525  | -4.2486708 | -0.1926687 |
| H  | 2.0146137  | -4.8333406 | 0.0881112  |
| C  | 1.0636184  | -2.8739212 | 0.0234749  |
| N  | -2.1257048 | -1.8326829 | -1.1780221 |
| N  | -1.9802452 | -0.5165011 | -0.8234411 |
| C  | -3.1071246 | 0.0931778  | -1.2227588 |
| H  | -3.2426175 | 1.1661396  | -1.0442219 |
| C  | -3.9943684 | -0.8246179 | -1.8417383 |
| H  | -4.9841072 | -0.6231243 | -2.2625562 |
| C  | -3.3372474 | -2.0470996 | -1.7940212 |
| H  | -3.6416083 | -3.0354658 | -2.1501612 |
| N  | 2.1054085  | -2.1156455 | 0.6174420  |
| N  | 1.9279020  | -0.7651067 | 0.7566435  |
| C  | 3.0398072  | -0.3133882 | 1.3578403  |
| H  | 3.1483836  | 0.7540492  | 1.5815943  |
| C  | 3.9485094  | -1.3713946 | 1.6143794  |
| H  | 4.9322007  | -1.3136388 | 2.0900540  |
| C  | 3.3203549  | -2.5105136 | 1.1267439  |
| H  | 3.6467511  | -3.5545654 | 1.1093193  |
| N  | 0.2268142  | 2.1200904  | 0.2192453  |
| C  | 0.7944611  | 2.8622640  | -0.7591911 |
| C  | 1.0157619  | 4.2330362  | -0.6466391 |
| H  | 1.4879034  | 4.8075610  | -1.4533208 |
| C  | 0.6176819  | 4.8855523  | 0.5576456  |
| C  | 0.0110486  | 4.1094953  | 1.5820892  |
| C  | -0.1541785 | 2.7382924  | 1.3559180  |
| N  | 1.1421385  | 2.0971236  | -1.9022512 |
| N  | 0.9097070  | 0.7477018  | -1.8764393 |
| C  | 1.3138779  | 0.2872847  | -3.0709094 |
| H  | 1.2357972  | -0.7810566 | -3.3028630 |
| C  | 1.8116243  | 1.3384256  | -3.8822736 |
| H  | 2.2089175  | 1.2733180  | -4.8997068 |
| C  | 1.6882493  | 2.4825270  | -3.1040183 |
| H  | 1.9428847  | 3.5243739  | -3.3201155 |
| N  | -0.7463388 | 1.8535376  | 2.2929164  |
| N  | -0.8799939 | 0.5338648  | 1.9471610  |
| C  | -1.4586968 | -0.0608020 | 3.0015544  |
| H  | -1.6820825 | -1.1334900 | 2.9709136  |
| C  | -1.7040507 | 0.8701929  | 4.0435416  |
| H  | -2.1643033 | 0.6829143  | 5.0184144  |
| C  | -1.2396318 | 2.0849171  | 3.5567792  |
| H  | -1.2276472 | 3.0790402  | 4.0128808  |
| H  | -0.3197084 | 4.5681717  | 2.5190757  |
| H  | -2.0095176 | -4.5549497 | -1.5973905 |
| S  | 0.1476612  | -6.6188480 | -1.0330709 |
| S  | 0.9264582  | 6.6038114  | 0.6399282  |
| C  | 0.3361188  | 7.1103982  | 2.2872828  |
| C  | -1.4248608 | -7.1165992 | -1.8073585 |
| H  | -1.5535774 | -6.6518911 | -2.8031688 |
| H  | -2.2865774 | -6.9095733 | -1.1452205 |
| H  | -1.3339752 | -8.2112904 | -1.9366473 |
| H  | -0.7533638 | 6.9516031  | 2.3945988  |
| H  | 0.5418292  | 8.1962429  | 2.3319963  |
| H  | 0.9036899  | 6.6083345  | 3.0934072  |

---

**I<sup>2+</sup>**, perpendicular conformation, low-spin

---

|    |            |            |            |
|----|------------|------------|------------|
| Fe | 0.0000001  | -0.0000001 | 0.1435057  |
| N  | -1.9015907 | 0.0726083  | 0.1559028  |
| C  | -2.5504936 | 0.9422845  | -0.6561707 |
| C  | -3.9466974 | 1.0587466  | -0.6544127 |
| C  | -4.6817301 | 0.2464658  | 0.2444789  |
| C  | -3.9999494 | -0.6746560 | 1.0778440  |
| H  | -4.5645151 | -1.3074306 | 1.7744628  |
| C  | -2.6014759 | -0.7188621 | 1.0050738  |
| N  | -1.6354374 | 1.6686416  | -1.4392483 |
| N  | -0.2968387 | 1.3893283  | -1.2352694 |
| C  | 0.3747542  | 2.1950195  | -2.0725153 |
| H  | 1.4693363  | 2.1695062  | -2.1062337 |
| C  | -0.5213684 | 3.0008995  | -2.8241448 |
| H  | -0.2676851 | 3.7488260  | -3.5814582 |
| C  | -1.7930092 | 2.6427368  | -2.3988907 |
| H  | -2.7827836 | 2.9999922  | -2.7000481 |
| N  | -1.7348323 | -1.5290099 | 1.7601438  |
| N  | -0.3827586 | -1.3673151 | 1.5226145  |
| C  | 0.2378110  | -2.2241180 | 2.3482439  |
| H  | 1.3311530  | -2.2923600 | 2.3564565  |
| C  | -0.7060502 | -2.9468324 | 3.1260559  |
| H  | -0.4991233 | -3.7111197 | 3.8812905  |
| C  | -1.9522404 | -2.4822375 | 2.7291912  |
| H  | -2.9613925 | -2.7517567 | 3.0562086  |
| N  | 1.9015907  | -0.0726085 | 0.1559030  |
| C  | 2.5504937  | -0.9422847 | -0.6561706 |
| C  | 3.9466974  | -1.0587467 | -0.6544125 |
| H  | 4.4698092  | -1.7724379 | -1.3035009 |
| C  | 4.6817300  | -0.2464658 | 0.2444790  |
| C  | 3.9999493  | 0.6746559  | 1.0778441  |
| C  | 2.6014759  | 0.7188620  | 1.0050739  |
| N  | 1.6354375  | -1.6686418 | -1.4392482 |
| N  | 0.2968388  | -1.3893284 | -1.2352693 |
| C  | -0.3747541 | -2.1950196 | -2.0725153 |
| H  | -1.4693362 | -2.1695063 | -2.1062337 |
| C  | 0.5213686  | -3.0008997 | -2.8241447 |
| H  | 0.2676853  | -3.7488262 | -3.5814581 |
| C  | 1.7930093  | -2.6427370 | -2.3988906 |
| H  | 2.7827837  | -2.9999923 | -2.7000480 |
| N  | 1.7348322  | 1.5290097  | 1.7601439  |
| N  | 0.3827586  | 1.3673150  | 1.5226145  |
| C  | -0.2378111 | 2.2241178  | 2.3482438  |
| H  | -1.3311531 | 2.2923598  | 2.3564563  |
| C  | 0.7060499  | 2.9468322  | 3.1260559  |
| H  | 0.4991229  | 3.7111195  | 3.8812905  |
| C  | 1.9522402  | 2.4822374  | 2.7291913  |
| H  | 2.9613923  | 2.7517566  | 3.0562087  |
| H  | -4.4698091 | 1.7724379  | -1.3035010 |
| H  | 4.5645151  | 1.3074306  | 1.7744629  |
| S  | -6.4705232 | 0.3841471  | 0.3269481  |
| S  | 6.4705232  | -0.3841470 | 0.3269482  |
| C  | -6.9630905 | -0.8620923 | -0.9353167 |
| C  | 6.9630906  | 0.8620931  | -0.9353172 |
| H  | 8.0692406  | 0.8371586  | -0.9329001 |
| H  | 6.6251027  | 1.8767588  | -0.6547960 |
| H  | 6.5987397  | 0.5847222  | -1.9417637 |
| H  | -6.6251028 | -1.8767580 | -0.6547956 |
| H  | -8.0692405 | -0.8371578 | -0.9328997 |
| H  | -6.5987396 | -0.5847216 | -1.9417632 |

---

**I<sup>2+</sup>**, perpendicular conformation, high-spin

---

|    |            |            |            |
|----|------------|------------|------------|
| Fe | 0.0000001  | -0.0000008 | 0.0767623  |
| N  | -2.1515008 | 0.0372765  | 0.1497734  |
| C  | -2.8449660 | 0.8706352  | -0.6523272 |
| C  | -4.2452929 | 0.9568933  | -0.6265282 |
| C  | -4.9422649 | 0.1435536  | 0.2963937  |
| C  | -4.2177444 | -0.7425945 | 1.1263784  |
| H  | -4.7526969 | -1.3777128 | 1.8430651  |
| C  | -2.8187147 | -0.7509564 | 1.0167584  |
| N  | -2.0180716 | 1.6347553  | -1.5103830 |
| N  | -0.6632460 | 1.4309472  | -1.4614744 |
| C  | -0.1373265 | 2.2819833  | -2.3564552 |
| H  | 0.9468748  | 2.3098451  | -2.5153935 |
| C  | -1.1491455 | 3.0465381  | -2.9925415 |
| H  | -1.0276053 | 3.8146576  | -3.7623946 |
| C  | -2.3403584 | 2.6065109  | -2.4304488 |
| H  | -3.3748885 | 2.9115344  | -2.6146481 |
| N  | -1.9658173 | -1.5695788 | 1.7959143  |
| N  | -0.6118842 | -1.4685505 | 1.6055986  |
| C  | -0.0617142 | -2.3542353 | 2.4510694  |
| H  | 1.0277854  | -2.4657539 | 2.4983166  |
| C  | -1.0564245 | -3.0394409 | 3.1949738  |
| H  | -0.9135212 | -3.8130121 | 3.9556568  |
| C  | -2.2630671 | -2.5130240 | 2.7529728  |
| H  | -3.2928086 | -2.7382595 | 3.0465214  |
| N  | 2.1515009  | -0.0372766 | 0.1497730  |
| C  | 2.8449663  | -0.8706352 | -0.6523274 |
| C  | 4.2452931  | -0.9568928 | -0.6265285 |
| H  | 4.8020544  | -1.6415262 | -1.2782081 |
| C  | 4.9422647  | -0.1435526 | 0.2963933  |
| C  | 4.2177440  | 0.7425952  | 1.1263782  |
| C  | 2.8187145  | 0.7509564  | 1.0167583  |
| N  | 2.0180721  | -1.6347558 | -1.5103828 |
| N  | 0.6632463  | -1.4309486 | -1.4614740 |
| C  | 0.1373277  | -2.2819853 | -2.3564549 |
| H  | -0.9468735 | -2.3098481 | -2.5153934 |
| C  | 1.1491473  | -3.0465394 | -2.9925412 |
| H  | 1.0276077  | -3.8146592 | -3.7623942 |
| C  | 2.3403598  | -2.6065110 | -2.4304489 |
| H  | 3.3748902  | -2.9115333 | -2.6146485 |
| N  | 1.9658169  | 1.5695785  | 1.7959142  |
| N  | 0.6118839  | 1.4685500  | 1.6055991  |
| C  | 0.0617139  | 2.3542347  | 2.4510701  |
| H  | -1.0277857 | 2.4657528  | 2.4983175  |
| C  | 1.0564241  | 3.0394403  | 3.1949742  |
| H  | 0.9135208  | 3.8130113  | 3.9556574  |
| C  | 2.2630666  | 2.5130241  | 2.7529723  |
| H  | 3.2928082  | 2.7382601  | 3.0465204  |
| H  | -4.8020539 | 1.6415268  | -1.2782080 |
| H  | 4.7526963  | 1.3777137  | 1.8430647  |
| S  | -6.7331565 | 0.2359258  | 0.4128198  |
| S  | 6.7331564  | -0.2359238 | 0.4128190  |
| C  | -7.2184078 | -1.0429271 | -0.8196748 |
| C  | 7.2184062  | 1.0429288  | -0.8196752 |
| H  | 8.3247608  | 1.0350509  | -0.8015263 |
| H  | 6.8601822  | 2.0471997  | -0.5264369 |
| H  | 6.8728995  | 0.7779153  | -1.8361539 |
| H  | -6.8601844 | -2.0471983 | -0.5264363 |
| H  | -8.3247624 | -1.0350482 | -0.8015253 |
| H  | -6.8729011 | -0.7779139 | -1.8361535 |

---

**2<sup>2+</sup>**, parallel conformation, low-spin

---

|    |            |            |            |
|----|------------|------------|------------|
| Fe | 0.0000002  | 0.3446272  | 0.0000001  |
| N  | 1.8981659  | 0.3309615  | -0.1568477 |
| C  | 2.6408709  | -0.5069113 | 0.6038677  |
| C  | 4.0329467  | -0.5808696 | 0.5102499  |
| C  | 4.6878382  | 0.2592062  | -0.4378688 |
| C  | 3.8942086  | 1.1471949  | -1.2312195 |
| H  | 4.3719678  | 1.8092265  | -1.9647587 |
| C  | 2.5143027  | 1.1421681  | -1.0541500 |
| N  | 1.8098494  | -1.2622643 | 1.4560390  |
| N  | 0.4510210  | -1.0302168 | 1.3499543  |
| C  | -0.1297136 | -1.8506336 | 2.2391686  |
| H  | -1.2191856 | -1.8582694 | 2.3524909  |
| C  | 0.8456792  | -2.6199794 | 2.9274161  |
| H  | 0.6746878  | -3.3690465 | 3.7063029  |
| C  | 2.0696669  | -2.2221498 | 2.4063959  |
| H  | 3.0897758  | -2.5430983 | 2.6375088  |
| N  | 1.5653198  | 1.9279328  | -1.7382629 |
| N  | 0.2409731  | 1.7232000  | -1.3991978 |
| C  | -0.4666827 | 2.5662252  | -2.1678866 |
| H  | -1.5586904 | 2.5997143  | -2.0895862 |
| C  | 0.3918370  | 3.3219408  | -3.0090484 |
| H  | 0.1053534  | 4.0847980  | -3.7390745 |
| C  | 1.6783971  | 2.8927721  | -2.7118135 |
| H  | 2.6507715  | 3.1973632  | -3.1109201 |
| N  | -1.8981659 | 0.3309618  | 0.1568476  |
| C  | -2.6408709 | -0.5069110 | -0.6038679 |
| C  | -4.0329467 | -0.5808692 | -0.5102502 |
| H  | -4.5958401 | -1.2742233 | -1.1434229 |
| C  | -4.6878381 | 0.2592066  | 0.4378686  |
| C  | -3.8942085 | 1.1471953  | 1.2312192  |
| C  | -2.5143026 | 1.1421684  | 1.0541498  |
| N  | -1.8098494 | -1.2622641 | -1.4560392 |
| N  | -0.4510210 | -1.0302168 | -1.3499546 |
| C  | 0.1297136  | -1.8506337 | -2.2391689 |
| H  | 1.2191856  | -1.8582696 | -2.3524911 |
| C  | -0.8456793 | -2.6199792 | -2.9274164 |
| H  | -0.6746880 | -3.3690462 | -3.7063033 |
| C  | -2.0696670 | -2.2221495 | -2.4063962 |
| H  | -3.0897759 | -2.5430978 | -2.6375093 |
| N  | -1.5653197 | 1.9279332  | 1.7382628  |
| N  | -0.2409730 | 1.7232002  | 1.3991980  |
| C  | 0.4666827  | 2.5662255  | 2.1678867  |
| H  | 1.5586905  | 2.5997145  | 2.0895864  |
| C  | -0.3918370 | 3.3219412  | 3.0090482  |
| H  | -0.1053536 | 4.0847986  | 3.7390743  |
| C  | -1.6783971 | 2.8927725  | 2.7118133  |
| H  | -2.6507715 | 3.1973638  | 3.1109197  |
| H  | 4.5958402  | -1.2742236 | 1.1434227  |
| H  | -4.3719677 | 1.8092269  | 1.9647586  |
| S  | 6.4041620  | 0.2862821  | -0.7684963 |
| S  | -6.4041619 | 0.2862822  | 0.7684964  |
| C  | -7.2158024 | -0.8724149 | -0.4542817 |
| H  | -6.5825306 | -1.7835511 | -0.4801251 |
| C  | 7.2158024  | -0.8724148 | 0.4542821  |
| H  | 6.5825307  | -1.7835510 | 0.4801256  |
| C  | 8.5768587  | -1.2333436 | -0.1612471 |
| H  | 9.1063264  | -1.9295846 | 0.5184662  |
| H  | 9.2189701  | -0.3388732 | -0.2863653 |
| H  | 8.4690212  | -1.7292716 | -1.1444453 |
| C  | -7.3299983 | -0.2329709 | -1.8423733 |
| H  | -7.9623539 | 0.6752873  | -1.8073782 |

|   |            |            |            |
|---|------------|------------|------------|
| H | -7.8068733 | -0.9506420 | -2.5406465 |
| H | -6.3476212 | 0.0517235  | -2.2670696 |
| C | -8.5768586 | -1.2333437 | 0.1612477  |
| H | -9.2189699 | -0.3388732 | 0.2863659  |
| H | -8.4690210 | -1.7292716 | 1.1444459  |
| H | -9.1063264 | -1.9295846 | -0.5184655 |
| C | 7.3299981  | -0.2329705 | 1.8423736  |
| H | 7.8068732  | -0.9506416 | 2.5406469  |
| H | 6.3476210  | 0.0517237  | 2.2670697  |
| H | 7.9623537  | 0.6752876  | 1.8073784  |

---

**2<sup>2+</sup>, parallel conformation, high-spin**

---

|    |            |            |            |
|----|------------|------------|------------|
| Fe | -0.0672642 | -0.4495442 | -0.1272230 |
| N  | -2.1685685 | -0.0683385 | -0.2649238 |
| C  | -2.6474921 | 0.8823749  | -1.0936718 |
| C  | -4.0069174 | 1.1833104  | -1.2224115 |
| H  | -4.3480304 | 1.9505946  | -1.9236219 |
| C  | -4.9327800 | 0.4549823  | -0.4237081 |
| C  | -4.4247124 | -0.5548214 | 0.4485534  |
| H  | -5.1148317 | -1.1312268 | 1.0770876  |
| C  | -3.0497377 | -0.7755944 | 0.4794159  |
| N  | -1.6250326 | 1.5397363  | -1.8269934 |
| N  | -0.3289712 | 1.1359807  | -1.6430594 |
| C  | 0.4130146  | 1.9216466  | -2.4388189 |
| H  | 1.5006091  | 1.7907200  | -2.4776066 |
| C  | -0.3985749 | 2.8449568  | -3.1462502 |
| H  | -0.0812669 | 3.6061722  | -3.8653256 |
| C  | -1.6963840 | 2.5717021  | -2.7335492 |
| H  | -2.6473806 | 3.0320419  | -3.0162922 |
| N  | -2.4235931 | -1.7535669 | 1.2951375  |
| N  | -1.0576996 | -1.8502856 | 1.2632800  |
| C  | -0.7455633 | -2.8536472 | 2.0984608  |
| H  | 0.3031044  | -3.1314165 | 2.2550745  |
| C  | -1.9102870 | -3.4174308 | 2.6782746  |
| H  | -1.9741087 | -4.2437076 | 3.3926658  |
| C  | -2.9661517 | -2.6893453 | 2.1444815  |
| H  | -4.0452772 | -2.7720713 | 2.3041688  |
| S  | -6.6675867 | 0.6541574  | -0.4254566 |
| C  | -7.0568287 | 2.1200645  | -1.5194800 |
| H  | -6.4690393 | 1.9743973  | -2.4501818 |
| C  | -6.7041251 | 3.4463002  | -0.8376176 |
| H  | -6.9436432 | 4.2859231  | -1.5214644 |
| H  | -5.6318510 | 3.5223374  | -0.5716319 |
| H  | -7.2933440 | 3.5868100  | 0.0894116  |
| C  | -8.5509245 | 1.9900416  | -1.8550550 |
| H  | -9.1783388 | 2.0428980  | -0.9432790 |
| H  | -8.7765017 | 1.0449555  | -2.3842633 |
| H  | -8.8472294 | 2.8305181  | -2.5128989 |
| N  | 2.0263099  | -0.8241112 | 0.1103016  |
| C  | 2.6577850  | -1.7368320 | -0.6633292 |
| C  | 4.0128669  | -2.0355606 | -0.5419247 |
| H  | 4.4982679  | -2.7738710 | -1.1921312 |
| C  | 4.7747293  | -1.3530727 | 0.4544051  |
| C  | 4.1090887  | -0.3947417 | 1.2689985  |
| H  | 4.6447297  | 0.1499145  | 2.0522908  |
| C  | 2.7460965  | -0.1749626 | 1.0485511  |
| N  | 1.7955111  | -2.3436893 | -1.6132745 |
| N  | 0.4883044  | -1.9361535 | -1.6576142 |
| C  | -0.0882911 | -2.6694864 | -2.6225419 |
| H  | -1.1485005 | -2.5256841 | -2.8606643 |
| C  | 0.8428806  | -3.5627054 | -3.2109939 |
| H  | 0.6696128  | -4.2814110 | -4.0176251 |

|   |            |            |            |
|---|------------|------------|------------|
| C | 2.0383887  | -3.3272254 | -2.5434004 |
| H | 3.0255526  | -3.7832863 | -2.6633541 |
| N | 1.9709744  | 0.7517771  | 1.7944041  |
| N | 0.6328717  | 0.8494909  | 1.5211168  |
| C | 0.1615111  | 1.7960791  | 2.3473966  |
| H | -0.9020348 | 2.0602233  | 2.3278545  |
| C | 1.1942197  | 2.3220057  | 3.1650126  |
| H | 1.1162647  | 3.0992704  | 3.9311425  |
| C | 2.3381235  | 1.6308236  | 2.7861949  |
| H | 3.3686439  | 1.7049267  | 3.1449488  |
| S | 6.4556642  | -1.8095976 | 0.5732287  |
| C | 7.2443697  | -0.6867748 | 1.8448538  |
| H | 6.5387462  | -0.6469064 | 2.7008391  |
| C | 7.5054243  | 0.7114834  | 1.2743537  |
| H | 6.5787040  | 1.2167333  | 0.9387767  |
| H | 8.1979545  | 0.6665256  | 0.4115316  |
| H | 7.9750192  | 1.3456683  | 2.0536913  |
| C | 8.5229000  | -1.4113478 | 2.2922586  |
| H | 8.3041619  | -2.3969747 | 2.7447675  |
| H | 9.0412574  | -0.7923915 | 3.0507526  |
| H | 9.2252014  | -1.5597618 | 1.4479539  |

---

**2<sup>2+</sup>**, perpendicular conformation, low-spin

---

|    |            |            |            |
|----|------------|------------|------------|
| Fe | -0.0119133 | -0.0829535 | 0.3199271  |
| N  | -1.9033235 | 0.1318631  | 0.3178423  |
| C  | -2.4789255 | 1.0511017  | -0.4945487 |
| C  | -3.8591070 | 1.2877931  | -0.4876964 |
| C  | -4.6595890 | 0.5541755  | 0.4261630  |
| C  | -4.0535396 | -0.4268360 | 1.2532377  |
| H  | -4.6679342 | -1.0032413 | 1.9563117  |
| C  | -2.6657141 | -0.5947271 | 1.1715823  |
| N  | -1.5068261 | 1.6988405  | -1.2789223 |
| N  | -0.1949805 | 1.3210320  | -1.0649346 |
| C  | 0.5413186  | 2.0710300  | -1.9001786 |
| H  | 1.6309674  | 1.9622105  | -1.9254075 |
| C  | -0.2867170 | 2.9388609  | -2.6601639 |
| H  | 0.0272795  | 3.6626004  | -3.4182841 |
| C  | -1.5844807 | 2.6791034  | -2.2414236 |
| H  | -2.5426655 | 3.1084915  | -2.5501139 |
| N  | -1.8677756 | -1.4738825 | 1.9266416  |
| N  | -0.5066589 | -1.4206339 | 1.6938247  |
| C  | 0.0396580  | -2.3302065 | 2.5159159  |
| H  | 1.1239160  | -2.4867576 | 2.5260843  |
| C  | -0.9619821 | -2.9783437 | 3.2867409  |
| H  | -0.8204255 | -3.7617689 | 4.0373594  |
| C  | -2.1651358 | -2.4114139 | 2.8887844  |
| H  | -3.1943074 | -2.6004488 | 3.2094937  |
| N  | 1.8789312  | -0.2933356 | 0.3662906  |
| C  | 2.4774141  | -1.2138913 | -0.4283786 |
| C  | 3.8576293  | -1.4438168 | -0.3875381 |
| H  | 4.3393784  | -2.2004208 | -1.0193657 |
| C  | 4.6355951  | -0.6954964 | 0.5341037  |
| C  | 4.0063657  | 0.2875889  | 1.3411179  |
| C  | 2.6185005  | 0.4425637  | 1.2313216  |
| N  | 1.5262258  | -1.8675968 | -1.2334428 |
| N  | 0.2088703  | -1.4890903 | -1.0561181 |
| C  | -0.5043037 | -2.2405915 | -1.9097252 |
| H  | -1.5928680 | -2.1318248 | -1.9649405 |
| C  | 0.3441291  | -3.1095021 | -2.6456916 |
| H  | 0.0509705  | -3.8343995 | -3.4110194 |
| C  | 1.6301349  | -2.8487900 | -2.1925165 |
| H  | 2.5964714  | -3.2783639 | -2.4744072 |

|   |            |            |            |
|---|------------|------------|------------|
| N | 1.7988622  | 1.3178758  | 1.9675867  |
| N | 0.4436162  | 1.2554807  | 1.7048187  |
| C | -0.1276686 | 2.1573577  | 2.5182501  |
| H | -1.2129828 | 2.3058849  | 2.5049838  |
| C | 0.8518055  | 2.8095161  | 3.3138249  |
| H | 0.6877634  | 3.5881557  | 4.0648429  |
| C | 2.0676613  | 2.2528920  | 2.9406967  |
| H | 3.0878007  | 2.4474422  | 3.2860050  |
| H | -4.3199092 | 2.0462155  | -1.1320224 |
| H | 4.5990447  | 0.8713817  | 2.0560730  |
| S | -6.4182419 | 0.8591405  | 0.5389898  |
| S | 6.3922914  | -1.0021680 | 0.6639114  |
| C | -7.1516311 | -0.3442354 | -0.7259444 |
| C | -8.6675852 | -0.2380128 | -0.5181580 |
| H | -8.9615610 | -0.4800838 | 0.5208017  |
| H | -9.1759048 | -0.9559829 | -1.1923043 |
| H | -9.0406577 | 0.7763315  | -0.7631951 |
| C | -6.7100988 | -0.0443988 | -2.1560346 |
| H | -7.1815913 | -0.7745351 | -2.8458883 |
| H | -5.6138683 | -0.1354102 | -2.2865348 |
| H | -7.0220195 | 0.9704692  | -2.4729815 |
| C | 7.1234485  | 0.1971306  | -0.6063663 |
| C | 8.5814311  | -0.2486469 | -0.7704990 |
| H | 8.6572487  | -1.3003305 | -1.1057420 |
| H | 9.1510294  | -0.1385813 | 0.1738845  |
| H | 9.0707465  | 0.3901117  | -1.5327388 |
| C | 6.9768530  | 1.6568999  | -0.1835338 |
| H | 7.4268522  | 2.3115785  | -0.9584728 |
| H | 7.5002205  | 1.8530169  | 0.7727998  |
| H | 5.9171126  | 1.9620077  | -0.0758539 |
| H | -6.8013448 | -1.3494749 | -0.4122851 |
| H | 6.5666946  | 0.0040501  | -1.5468390 |

---

**2<sup>2+</sup>, perpendicular conformation, high-spin**

---

|    |            |            |            |
|----|------------|------------|------------|
| Fe | -0.0000001 | -0.0000001 | 0.2117178  |
| N  | -2.1423257 | 0.1412081  | 0.3573111  |
| C  | -2.8220775 | 0.9998141  | -0.4294259 |
| C  | -4.2127065 | 1.1644146  | -0.3503664 |
| C  | -4.9186132 | 0.4142231  | 0.6213750  |
| C  | -4.2081335 | -0.5093376 | 1.4255473  |
| H  | -4.7482107 | -1.1044150 | 2.1719649  |
| C  | -2.8192423 | -0.6040505 | 1.2546043  |
| N  | -1.9884995 | 1.7075248  | -1.3301522 |
| N  | -0.6452005 | 1.4343530  | -1.3267825 |
| C  | -0.1097278 | 2.2430882  | -2.2551620 |
| H  | 0.9678578  | 2.2123201  | -2.4535927 |
| C  | -1.1035621 | 3.0498674  | -2.8663274 |
| H  | -0.9716203 | 3.7987761  | -3.6531493 |
| C  | -2.2940888 | 2.6813607  | -2.2528762 |
| H  | -3.3178780 | 3.0362988  | -2.4044151 |
| N  | -1.9843744 | -1.4736253 | 1.9986427  |
| N  | -0.6367254 | -1.4527038 | 1.7521364  |
| C  | -0.1061907 | -2.3791307 | 2.5660181  |
| H  | 0.9754639  | -2.5566853 | 2.5661719  |
| C  | -1.1086090 | -3.0094076 | 3.3470531  |
| H  | -0.9816052 | -3.7981399 | 4.0948074  |
| C  | -2.2984437 | -2.4058843 | 2.9605505  |
| H  | -3.3271260 | -2.5718364 | 3.2942118  |
| N  | 2.1423255  | -0.1412083 | 0.3573112  |
| C  | 2.8220773  | -0.9998142 | -0.4294258 |
| C  | 4.2127065  | -1.1644146 | -0.3503663 |
| H  | 4.7537546  | -1.8731111 | -0.9885119 |



|   |            |            |            |
|---|------------|------------|------------|
| C | 4.9186133  | -0.4142232 | 0.6213751  |
| C | 4.2081336  | 0.5093373  | 1.4255475  |
| C | 2.8192422  | 0.6040503  | 1.2546045  |
| N | 1.9884994  | -1.7075249 | -1.3301521 |
| N | 0.6452005  | -1.4343532 | -1.3267825 |
| C | 0.1097277  | -2.2430882 | -2.2551621 |
| H | -0.9678579 | -2.2123198 | -2.4535929 |
| C | 1.1035620  | -3.0498673 | -2.8663275 |
| H | 0.9716202  | -3.7987761 | -3.6531493 |
| C | 2.2940887  | -2.6813607 | -2.2528762 |
| H | 3.3178779  | -3.0362987 | -2.4044153 |
| N | 1.9843744  | 1.4736254  | 1.9986429  |
| N | 0.6367253  | 1.4527041  | 1.7521366  |
| C | 0.1061906  | 2.3791311  | 2.5660182  |
| H | -0.9754639 | 2.5566857  | 2.5661720  |
| C | 1.1086091  | 3.0094078  | 3.3470531  |
| H | 0.9816054  | 3.7981403  | 4.0948073  |
| C | 2.2984439  | 2.4058843  | 2.9605507  |
| H | 3.3271262  | 2.5718361  | 3.2942120  |
| H | -4.7537546 | 1.8731112  | -0.9885119 |
| H | 4.7482107  | 1.1044146  | 2.1719652  |
| S | -6.6822695 | 0.6249601  | 0.8354868  |
| S | 6.6822696  | -0.6249603 | 0.8354867  |
| C | -7.4177599 | -0.6478052 | -0.3595210 |
| C | -8.9285369 | -0.5840941 | -0.1018938 |
| H | -9.1774632 | -0.7895546 | 0.9566307  |
| H | -9.4319229 | -1.3509117 | -0.7240761 |
| H | -9.3480605 | 0.4035365  | -0.3786090 |
| C | -7.0348242 | -0.3915363 | -1.8145676 |
| H | -7.5231055 | -1.1523066 | -2.4579900 |
| H | -5.9434936 | -0.4747760 | -1.9838932 |
| H | -7.3729356 | 0.6069957  | -2.1557623 |
| C | 7.4177599  | 0.6478051  | -0.3595211 |
| C | 8.9285369  | 0.5840943  | -0.1018938 |
| H | 9.3480606  | -0.4035363 | -0.3786089 |
| H | 9.1774631  | 0.7895550  | 0.9566308  |
| H | 9.4319229  | 1.3509118  | -0.7240762 |
| C | 7.0348243  | 0.3915361  | -1.8145677 |
| H | 7.3729362  | -0.6069957 | -2.1557625 |
| H | 7.5231052  | 1.1523066  | -2.4579900 |
| H | 5.9434936  | 0.4747753  | -1.9838932 |
| H | -7.0249581 | -1.6288845 | -0.0212971 |
| H | 7.0249578  | 1.6288843  | -0.0212971 |

---

**3<sup>2+</sup>**, parallel conformation, low-spin

---

|    |            |            |            |
|----|------------|------------|------------|
| Fe | 0.0083313  | 0.1303610  | 0.4583019  |
| N  | 0.0802360  | 1.9615636  | -0.0529943 |
| C  | 0.9973838  | 2.3859640  | -0.9528179 |
| C  | 1.0839913  | 3.7133392  | -1.3788809 |
| C  | 0.1598955  | 4.6571536  | -0.8411263 |
| C  | -0.8030546 | 4.1965279  | 0.1145835  |
| H  | -1.5293344 | 4.8979454  | 0.5451090  |
| C  | -0.7997012 | 2.8524526  | 0.4718324  |
| N  | 1.8128727  | 1.3122659  | -1.3651653 |
| N  | 1.5302261  | 0.0790988  | -0.8079259 |
| C  | 2.4274887  | -0.7713151 | -1.3307012 |
| H  | 2.4150874  | -1.8288808 | -1.0457470 |
| C  | 3.2960520  | -0.0981216 | -2.2301689 |
| H  | 4.1211607  | -0.5276196 | -2.8060738 |
| C  | 2.8793627  | 1.2263826  | -2.2292196 |
| H  | 3.2562114  | 2.1012759  | -2.7672076 |
| N  | -1.6637076 | 2.2095592  | 1.3815691  |

|   |            |            |            |
|---|------------|------------|------------|
| N | -1.4738338 | 0.8513035  | 1.5505886  |
| C | -2.3910051 | 0.4639471  | 2.4513235  |
| H | -2.4501738 | -0.5846751 | 2.7621759  |
| C | -3.1792826 | 1.5668940  | 2.8730561  |
| H | -3.9988903 | 1.5609650  | 3.5977098  |
| C | -2.6913680 | 2.6633956  | 2.1744010  |
| H | -2.9903789 | 3.7160159  | 2.1822033  |
| N | -0.0742498 | -1.7026668 | 0.9724447  |
| C | -0.8537800 | -2.5718830 | 0.2889964  |
| C | -0.9713526 | -3.9201152 | 0.6355957  |
| H | -1.6285137 | -4.5801598 | 0.0635733  |
| C | -0.2281686 | -4.3979515 | 1.7556157  |
| C | 0.5972798  | -3.4680470 | 2.4683247  |
| C | 0.6348987  | -2.1445036 | 2.0423595  |
| N | -1.5058810 | -1.9136287 | -0.7734814 |
| N | -1.2494962 | -0.5623081 | -0.9063098 |
| C | -1.9744163 | -0.1555730 | -1.9606628 |
| H | -1.9479355 | 0.8928823  | -2.2768866 |
| C | -2.7050322 | -1.2380943 | -2.5177702 |
| H | -3.3800030 | -1.2122348 | -3.3783976 |
| C | -2.3856198 | -2.3426979 | -1.7393629 |
| H | -2.7121931 | -3.3851184 | -1.7993621 |
| N | 1.3720637  | -1.0870325 | 2.6130694  |
| N | 1.2297439  | 0.1516712  | 2.0163091  |
| C | 2.0084057  | 0.9873573  | 2.7217480  |
| H | 2.0706108  | 2.0460981  | 2.4480681  |
| C | 2.6601165  | 0.2981303  | 3.7780041  |
| H | 3.3540151  | 0.7126940  | 4.5152913  |
| C | 2.2343450  | -1.0201568 | 3.6818286  |
| H | 2.4753258  | -1.9016159 | 4.2840367  |
| H | 1.8541381  | 4.0140292  | -2.0942376 |
| H | 1.1825859  | -3.8035913 | 3.3340295  |
| S | 0.0566013  | 6.3681577  | -1.1960373 |
| S | -0.2109897 | -6.0194921 | 2.4128728  |
| C | 1.2117485  | 6.8866401  | -2.6177735 |
| C | 2.6919505  | 6.7235324  | -2.2354012 |
| H | 2.9177826  | 7.1987707  | -1.2623591 |
| H | 3.3151353  | 7.2211098  | -3.0064279 |
| H | 3.0225774  | 5.6689799  | -2.1931688 |
| C | 0.8328482  | 6.1531166  | -3.9142215 |
| H | 1.4466286  | 6.5551947  | -4.7460425 |
| H | -0.2313277 | 6.3111000  | -4.1728330 |
| H | 1.0205260  | 5.0635833  | -3.8655112 |
| C | 0.8542113  | 8.3872336  | -2.7225144 |
| H | 1.0941428  | 8.9358515  | -1.7911366 |
| H | -0.2160345 | 8.5407568  | -2.9609390 |
| H | 1.4502748  | 8.8360051  | -3.5417527 |
| C | -1.2396997 | -7.2366053 | 1.3726741  |
| C | -0.9669908 | -8.5503851 | 2.1398763  |
| H | -1.3075291 | -8.4933705 | 3.1918521  |
| H | 0.1061897  | -8.8217132 | 2.1283171  |
| H | -1.5285946 | -9.3692729 | 1.6482305  |
| C | -2.7348401 | -6.8825431 | 1.4348250  |
| H | -3.0961686 | -6.8279965 | 2.4792771  |
| H | -3.3142944 | -7.6742075 | 0.9173952  |
| H | -2.9773936 | -5.9236250 | 0.9387598  |
| C | -0.6892069 | -7.3361056 | -0.0594237 |
| H | -1.2156551 | -8.1567153 | -0.5885534 |
| H | 0.3916062  | -7.5728285 | -0.0601805 |
| H | -0.8379549 | -6.4164545 | -0.6574531 |

**3<sup>2+</sup>**, parallel conformation, high-spin

---

|    |            |            |            |
|----|------------|------------|------------|
| Fe | -0.1665550 | 0.0590024  | 0.4237895  |
| N  | 0.0198908  | 2.1782506  | 0.1903060  |
| C  | 1.1237823  | 2.7222781  | -0.3598302 |
| C  | 1.3064759  | 4.0969827  | -0.5382449 |
| C  | 0.2666974  | 4.9765845  | -0.1232573 |
| C  | -0.9050326 | 4.3946385  | 0.4542635  |
| H  | -1.7305029 | 5.0403089  | 0.7789326  |
| C  | -0.9707649 | 3.0103172  | 0.5865865  |
| N  | 2.0882786  | 1.7492415  | -0.7347296 |
| N  | 1.8168892  | 0.4318092  | -0.4777626 |
| C  | 2.8724124  | -0.2542294 | -0.9429924 |
| H  | 2.9008833  | -1.3459426 | -0.8497876 |
| C  | 3.8398915  | 0.6161163  | -1.5067501 |
| H  | 4.7998491  | 0.3515317  | -1.9601909 |
| C  | 3.3073086  | 1.8903445  | -1.3553613 |
| H  | 3.7027676  | 2.8685408  | -1.6431982 |
| N  | -2.0812335 | 2.3194384  | 1.1387860  |
| N  | -2.0417963 | 0.9510386  | 1.1762547  |
| C  | -3.1987836 | 0.5698394  | 1.7400582  |
| H  | -3.4150360 | -0.4954714 | 1.8805531  |
| C  | -3.9984499 | 1.6919678  | 2.0745641  |
| H  | -4.9872394 | 1.6981013  | 2.5430101  |
| C  | -3.2548197 | 2.7953415  | 1.6740886  |
| H  | -3.4742077 | 3.8654364  | 1.7338340  |
| N  | -0.3578410 | -2.0540448 | 0.6585272  |
| C  | -0.9128085 | -2.8155479 | -0.3064332 |
| C  | -1.0741574 | -4.2008610 | -0.2059766 |
| H  | -1.5482839 | -4.7645293 | -1.0131130 |
| C  | -0.6174352 | -4.8496853 | 0.9764972  |
| C  | -0.0284036 | -4.0384206 | 1.9960448  |
| C  | 0.0701675  | -2.6656675 | 1.7873909  |
| N  | -1.3274149 | -2.0582841 | -1.4344175 |
| N  | -1.1612235 | -0.6991162 | -1.4010562 |
| C  | -1.6188953 | -0.2476373 | -2.5788923 |
| H  | -1.6014470 | 0.8260630  | -2.7985794 |
| C  | -2.0859651 | -1.3143317 | -3.3886774 |
| H  | -2.5149396 | -1.2588607 | -4.3936881 |
| C  | -1.8866652 | -2.4579049 | -2.6257328 |
| H  | -2.0982204 | -3.5083105 | -2.8451976 |
| N  | 0.6377286  | -1.7621262 | 2.7236158  |
| N  | 0.7118153  | -0.4369243 | 2.3861278  |
| C  | 1.2720448  | 0.1759502  | 3.4409045  |
| H  | 1.4480981  | 1.2574830  | 3.4166828  |
| C  | 1.5651330  | -0.7506114 | 4.4734284  |
| H  | 2.0225843  | -0.5508909 | 5.4470567  |
| C  | 1.1486235  | -1.9813792 | 3.9811325  |
| H  | 1.1785278  | -2.9782383 | 4.4309075  |
| H  | 0.3405963  | -4.5064396 | 2.9172690  |
| H  | 2.2288333  | 4.4808135  | -0.9801410 |
| S  | 0.2319962  | 6.7211269  | -0.2234028 |
| S  | -0.6953949 | -6.5510665 | 1.3671265  |
| C  | -1.3498395 | -7.5959780 | -0.0826675 |
| C  | -2.8216919 | -7.2656075 | -0.3805633 |
| H  | -3.4460094 | -7.3530039 | 0.5284258  |
| H  | -3.2073750 | -7.9895961 | -1.1269275 |
| H  | -2.9703298 | -6.2533351 | -0.8016907 |
| C  | -1.2354318 | -9.0137427 | 0.5231585  |
| H  | -1.8625185 | -9.1308196 | 1.4282540  |
| H  | -0.1892490 | -9.2694639 | 0.7795176  |
| H  | -1.5886579 | -9.7470509 | -0.2287060 |
| C  | -0.4293027 | -7.4672934 | -1.3072875 |

|   |            |            |            |
|---|------------|------------|------------|
| H | -0.7663146 | -8.1847518 | -2.0832376 |
| H | 0.6191698  | -7.7138180 | -1.0535576 |
| H | -0.4452760 | -6.4597628 | -1.7649706 |
| C | 1.8036702  | 7.4339009  | -1.0324423 |
| C | 1.4794125  | 8.9436171  | -0.9753513 |
| H | 1.3418002  | 9.2978240  | 0.0647403  |
| H | 0.5720258  | 9.1936755  | -1.5582589 |
| H | 2.3284572  | 9.5051768  | -1.4130903 |
| C | 1.9219893  | 6.9675389  | -2.4925343 |
| H | 2.7759585  | 7.4920383  | -2.9682584 |
| H | 1.0112417  | 7.2114353  | -3.0718728 |
| H | 2.1101184  | 5.8817320  | -2.5913353 |
| C | 3.0488147  | 7.1279819  | -0.1843968 |
| H | 2.9175724  | 7.4659281  | 0.8605710  |
| H | 3.9139951  | 7.6755143  | -0.6113005 |
| H | 3.3200119  | 6.0558353  | -0.1665430 |

**3<sup>2+</sup>**, perpendicular conformation, low-spin

|    |            |            |            |
|----|------------|------------|------------|
| Fe | 0.0000005  | -0.0000001 | 0.4045050  |
| N  | -1.8915993 | 0.2029450  | 0.4270043  |
| C  | -2.4858668 | 1.1100145  | -0.3858098 |
| C  | -3.8681447 | 1.3297807  | -0.3676440 |
| C  | -4.6534160 | 0.5953695  | 0.5602992  |
| C  | -4.0274435 | -0.3805047 | 1.3801802  |
| H  | -4.6250722 | -0.9625488 | 2.0922983  |
| C  | -2.6389623 | -0.5330751 | 1.2853426  |
| N  | -1.5268787 | 1.7669055  | -1.1797719 |
| N  | -0.2095478 | 1.4012054  | -0.9780584 |
| C  | 0.5124733  | 2.1618871  | -1.8159757 |
| H  | 1.6029352  | 2.0641329  | -1.8503363 |
| C  | -0.3304609 | 3.0233347  | -2.5667927 |
| H  | -0.0300158 | 3.7526537  | -3.3250151 |
| C  | -1.6222628 | 2.7487723  | -2.1386973 |
| H  | -2.5873380 | 3.1692224  | -2.4379875 |
| N  | -1.8245897 | -1.4037272 | 2.0334923  |
| N  | -0.4670768 | -1.3397267 | 1.7834721  |
| C  | 0.0979184  | -2.2388634 | 2.6043608  |
| H  | 1.1835730  | -2.3854672 | 2.6017382  |
| C  | -0.8881024 | -2.8912986 | 3.3914397  |
| H  | -0.7300948 | -3.6685580 | 4.1451399  |
| C  | -2.1013086 | -2.3376131 | 3.0051508  |
| H  | -3.1245714 | -2.5336368 | 3.3401430  |
| N  | 1.8915992  | -0.2029451 | 0.4270044  |
| C  | 2.4858669  | -1.1100145 | -0.3858096 |
| C  | 3.8681448  | -1.3297806 | -0.3676440 |
| H  | 4.3446431  | -2.0771874 | -1.0134874 |
| C  | 4.6534161  | -0.5953695 | 0.5602992  |
| C  | 4.0274435  | 0.3805045  | 1.3801804  |
| C  | 2.6389623  | 0.5330747  | 1.2853428  |
| N  | 1.5268789  | -1.7669055 | -1.1797717 |
| N  | 0.2095481  | -1.4012058 | -0.9780578 |
| C  | -0.5124731 | -2.1618876 | -1.8159749 |
| H  | -1.6029350 | -2.0641336 | -1.8503352 |
| C  | 0.3304610  | -3.0233352 | -2.5667920 |
| H  | 0.0300159  | -3.7526545 | -3.3250142 |
| C  | 1.6222630  | -2.7487725 | -2.1386969 |
| H  | 2.5873381  | -3.1692224 | -2.4379875 |
| N  | 1.8245898  | 1.4037270  | 2.0334924  |
| N  | 0.4670769  | 1.3397266  | 1.7834719  |
| C  | -0.0979184 | 2.2388632  | 2.6043605  |
| H  | -1.1835730 | 2.3854670  | 2.6017379  |
| C  | 0.8881024  | 2.8912984  | 3.3914397  |

|   |            |            |            |
|---|------------|------------|------------|
| H | 0.7300948  | 3.6685578  | 4.1451398  |
| C | 2.1013086  | 2.3376128  | 3.0051509  |
| H | 3.1245714  | 2.5336366  | 3.3401431  |
| H | -4.3446430 | 2.0771874  | -1.0134875 |
| H | 4.6250721  | 0.9625485  | 2.0922986  |
| S | -6.4080709 | 0.9002253  | 0.6900292  |
| S | 6.4080709  | -0.9002252 | 0.6900291  |
| C | -7.2247922 | -0.3045597 | -0.5657680 |
| C | -8.7109136 | 0.0766026  | -0.4224117 |
| H | -9.0779267 | -0.0863656 | 0.6093277  |
| H | -9.3088728 | -0.5658556 | -1.0997159 |
| H | -8.8942764 | 1.1310173  | -0.7047999 |
| C | -6.7111357 | -0.0278075 | -1.9836690 |
| H | -7.2705053 | -0.6617127 | -2.7027201 |
| H | -5.6375420 | -0.2798173 | -2.0958720 |
| H | -6.8670696 | 1.0285405  | -2.2754678 |
| C | -6.9771715 | -1.7547981 | -0.1331888 |
| H | -7.3234460 | -1.9307291 | 0.9028840  |
| H | -5.9076935 | -2.0366895 | -0.2100072 |
| H | -7.5415438 | -2.4379073 | -0.8013607 |
| C | 7.2247920  | 0.3045600  | -0.5657681 |
| C | 8.7109136  | -0.0766020 | -0.4224118 |
| H | 8.8942765  | -1.1310167 | -0.7047999 |
| H | 9.0779267  | 0.0863664  | 0.6093275  |
| H | 9.3088726  | 0.5658562  | -1.0997163 |
| C | 6.7111355  | 0.0278079  | -1.9836690 |
| H | 6.8670697  | -1.0285400 | -2.2754681 |
| H | 7.2705049  | 0.6617134  | -2.7027201 |
| H | 5.6375418  | 0.2798174  | -2.0958720 |
| C | 6.9771711  | 1.7547983  | -0.1331886 |
| H | 7.5415433  | 2.4379077  | -0.8013604 |
| H | 7.3234456  | 1.9307292  | 0.9028842  |
| H | 5.9076931  | 2.0366896  | -0.2100071 |

---

**3<sup>2+</sup>**, perpendicular conformation, high-spin

---

|    |            |            |            |
|----|------------|------------|------------|
| Fe | 0.0001064  | 0.0002726  | 0.1843379  |
| N  | -2.1304200 | 0.2475551  | 0.3438984  |
| C  | -2.7719383 | 1.1424541  | -0.4344137 |
| C  | -4.1512607 | 1.3756880  | -0.3454451 |
| C  | -4.8905981 | 0.6558058  | 0.6261176  |
| C  | -4.2201242 | -0.3063284 | 1.4210010  |
| H  | -4.7817659 | -0.8775346 | 2.1695610  |
| C  | -2.8387034 | -0.4669720 | 1.2421066  |
| N  | -1.9089206 | 1.8096187  | -1.3395960 |
| N  | -0.5818183 | 1.4674744  | -1.3464284 |
| C  | -0.0119076 | 2.2463958  | -2.2798784 |
| H  | 1.0611203  | 2.1596445  | -2.4861051 |
| C  | -0.9666558 | 3.1036909  | -2.8834958 |
| H  | -0.8020843 | 3.8450306  | -3.6712987 |
| C  | -2.1702770 | 2.7971562  | -2.2609556 |
| H  | -3.1752534 | 3.2052061  | -2.4044337 |
| N  | -2.0447374 | -1.3810196 | 1.9778292  |
| N  | -0.6990034 | -1.4264629 | 1.7262616  |
| C  | -0.2130876 | -2.3832868 | 2.5332046  |
| H  | 0.8581345  | -2.6154796 | 2.5276466  |
| C  | -1.2431670 | -2.9666051 | 3.3143876  |
| H  | -1.1533997 | -3.7650244 | 4.0572002  |
| C  | -2.4021575 | -2.3011739 | 2.9359061  |
| H  | -3.4368819 | -2.4160029 | 3.2721271  |
| N  | 2.1305548  | -0.2474687 | 0.3442798  |
| C  | 2.7720536  | -1.1424393 | -0.4339708 |
| C  | 4.1513822  | -1.3757098 | -0.3450021 |

|   |            |            |            |
|---|------------|------------|------------|
| H | 4.6613656  | -2.1115818 | -0.9777078 |
| C | 4.8907739  | -0.6557334 | 0.6264239  |
| C | 4.2203152  | 0.3063617  | 1.4213485  |
| C | 2.8388877  | 0.4670269  | 1.2424768  |
| N | 1.9090104  | -1.8097253 | -1.3390341 |
| N | 0.5819255  | -1.4675286 | -1.3459464 |
| C | 0.0119640  | -2.2466766 | -2.2791695 |
| H | -1.0610692 | -2.1599480 | -2.4853752 |
| C | 0.9666636  | -3.1041456 | -2.8825911 |
| H | 0.8020473  | -3.8456854 | -3.6701915 |
| C | 2.1703150  | -2.7974717 | -2.2601805 |
| H | 3.1752736  | -3.2055865 | -2.4035843 |
| N | 2.0449516  | 1.3809612  | 1.9783110  |
| N | 0.6992445  | 1.4264493  | 1.7267198  |
| C | 0.2133196  | 2.3830350  | 2.5339367  |
| H | -0.8579033 | 2.6152023  | 2.5284556  |
| C | 1.2433829  | 2.9661525  | 3.3152891  |
| H | 1.1535994  | 3.7643442  | 4.0583366  |
| C | 2.4023785  | 2.3008855  | 2.9365923  |
| H | 3.4371008  | 2.4156389  | 3.2728423  |
| H | -4.6612737 | 2.1115203  | -0.9781741 |
| H | 4.7819817  | 0.8775739  | 2.1698856  |
| S | -6.6370464 | 0.9594382  | 0.8413183  |
| S | 6.6372741  | -0.9591813 | 0.8414257  |
| C | -7.4985459 | -0.2698126 | -0.3643590 |
| C | -8.9819894 | 0.0878913  | -0.1493004 |
| H | -9.2979232 | -0.0782486 | 0.8991609  |
| H | -9.6027153 | -0.5650430 | -0.7963765 |
| H | -9.1969989 | 1.1387037  | -0.4230211 |
| C | -7.0604362 | 0.0066930  | -1.8075586 |
| H | -7.6436494 | -0.6412787 | -2.4945502 |
| H | -5.9895426 | -0.2264807 | -1.9724809 |
| H | -7.2482138 | 1.0587057  | -2.0959840 |
| C | -7.2043987 | -1.7121637 | 0.0645961  |
| H | -7.4973399 | -1.8885259 | 1.1169431  |
| H | -6.1347194 | -1.9749728 | -0.0607747 |
| H | -7.7861569 | -2.4094348 | -0.5735394 |
| C | 7.4984121  | 0.2700999  | -0.3643963 |
| C | 8.9818580  | -0.0871891 | -0.1495750 |
| H | 9.1971618  | -1.1379770 | -0.4229535 |
| H | 9.2978756  | 0.0794956  | 0.8986546  |
| H | 9.6022014  | 0.5655669  | -0.7969941 |
| C | 7.0602304  | -0.0066872 | -1.8074910 |
| H | 7.2483417  | -1.0586318 | -2.0958866 |
| H | 7.6430711  | 0.6413932  | -2.4946022 |
| H | 5.9892838  | 0.2260987  | -1.9722588 |
| C | 7.2039427  | 1.7123937  | 0.0644424  |
| H | 7.7853396  | 2.4096815  | -0.5738936 |
| H | 7.4970223  | 1.8890056  | 1.1166698  |
| H | 6.1342170  | 1.9749066  | -0.0607204 |

---

## References

1. a) L. J. Kershaw Cook, H. J. Shepherd, T. P. Comyn, C. Baldé, O. Cespedes, G. Chastanet and M. A. Halcrow, *Chem. Eur. J.*, 2015, **21**, 4805;  
b) L. J. Kershaw Cook, R. Kulmaczewski, S. A. Barrett and M. A. Halcrow, *Inorg. Chem. Front.*, 2015, **2**, 662.
2. a) L. J. Kershaw Cook, R. Kulmaczewski, O. Cespedes and M. A. Halcrow, *Chem. Eur. J.*, 2016, **22**, 1789;  
b) M. A. Halcrow, I. Capel Berdiell, C. M. Pask and R. Kulmaczewski, *Inorg. Chem.*, 2019, **58**, 9811.
3. R. Kulmaczewski, F. Bamiduro, O. Cespedes and M. A. Halcrow, *Chem. Eur. J.*, 2021, **27**, 2082.
4. a) D. F. Evans, *J. Chem. Soc.*, 1959, 2003;  
b) E. M. Schubert, *J. Chem. Educ.*, 1992, **69**, 62.
5. C. J. O'Connor, *Prog. Inorg. Chem.*, 1982, **29**, 203.
6. B. García and J. C. Ortega, *J. Chem. Eng. Data*, 1988, **33**, 200.
7. *Spartan'18*, Wavefunction Inc., Irvine, CA, **2018**.
8. I. Capel Berdiell, R. Kulmaczewski and M. A. Halcrow, *Inorg. Chem.*, 2017, **56**, 8817.
9. C. A. Bessel, R. F. See, D. L. Jameson, M. R. Churchill and K. J. Takeuchi, *J. Chem. Soc. Dalton Trans.*, 1992, 3223.
